# 1 HNF4 factors control chromatin accessibility and are redundantly required 2 for maturation of the fetal intestine

3 Lei Chen<sup>1,2</sup>, Natalie H. Toke<sup>1</sup>, Shirley Luo<sup>1</sup>, Roshan P. Vasoya<sup>1</sup>, Rohit Aita<sup>1</sup>, Aditya Parthasarathy<sup>1</sup>,  
4 Yu-Hwai Tsai<sup>3</sup>, Jason R. Spence<sup>3,4,5,6</sup>, Michael P. Verzi<sup>1,2,\*</sup>

5 <sup>1</sup>Department of Genetics, Human Genetics Institute of New Jersey, Rutgers University,  
6 Piscataway, NJ 08854, USA

7 <sup>2</sup>Rutgers Cancer Institute of New Jersey, New Brunswick, NJ 08903, USA

8 <sup>3</sup>Department of Internal Medicine, Gastroenterology, University of Michigan Medical School,  
9 Ann Arbor, MI 48109, USA

10 <sup>4</sup>Department of Cell and Developmental Biology, University of Michigan Medical School, Ann  
11 Arbor, MI 48109, USA

12 <sup>5</sup>Department of Biomedical Engineering, University of Michigan College of Engineering, Ann  
13 Arbor, MI, USA.

14 <sup>6</sup>Center for Organogenesis, University of Michigan Medical School, Ann Arbor, MI 48109, USA

15

16 \*Corresponding Author: [verzi@biology.rutgers.edu](mailto:verzi@biology.rutgers.edu) (M.P.V.)

17

## 18 ABSTRACT

19 As an embryo matures into a fetus, cells undergo remarkable transitions, accompanied by shifts  
20 in transcription factor regulatory networks and chromatin landscapes. The mechanisms of these  
21 developmental transitions are not completely understood. The embryonic intestine transitions  
22 from a rapidly proliferating tube with pseudostratified epithelium prior to embryonic day (E)  
23 14.5, to an exquisitely folded columnar epithelium in the fetus. We sought to define factors that  
24 drive fetal maturation of the intestine. ATAC-seq profiling revealed a dramatic restructuring of  
25 intestinal chromatin during the embryonic-to-fetal transition, with CDX2 transcription factor  
26 motifs abundant at chromatin-accessible regions of the embryo, and hepatocyte nuclear factor  
27 4 (HNF4) transcription factor motifs the most abundant in the fetal stages. Genetic inactivation  
28 of *Hnf4α* and its paralog, *Hnf4γ*, revealed that HNF4 factors are redundantly and vitally required  
29 for fetal maturation. In the embryo, CDX2 binds to and activates *Hnf4* gene loci to drive HNF4  
30 expression at fetal stages. HNF4 and CDX2 transcription factors then occupy shared genomic  
31 regulatory sites and are required for chromatin accessibility at genes expressed in the maturing  
32 fetal intestine. Thus, intestinal transcription factor regulatory networks shift to accompany  
33 changing chromatin landscapes and gene expression profiles that occur during the transition of  
34 an embryonic tissue to its mature state.

35

## 36 KEY WORDS

37 HNF4 transcription factors, Developing intestine, Maturation, Chromatin

38

39

## 40 INTRODUCTION

41 The developing embryo is a collection of partially-fated cells that expand exponentially during  
42 the stages of organogenesis, approximately E9.5 to E13.5 in mice (Cao et al., 2019). As  
43 development proceeds into fetal stages, specified cells undergo transitions to acquire  
44 characteristics of mature tissues. The mechanisms of these developmental transitions are not  
45 completely understood, but are of great importance in understanding the basic mechanisms of  
46 development and developmental disorders, and in facilitating efforts of regenerative medicine.

47 The embryonic gut tube arises from endoderm after gastrulation and is specified along the  
48 anterior-posterior axis into distinct derivative endodermal organs. The primitive gut divides into  
49 foregut, midgut and hindgut; the small intestine develops primarily from the midgut. Murine gut  
50 tube formation is completed by E9.5, and its inner lining consists of a highly-proliferative,  
51 pseudostratified epithelium as the gut tube elongates, with the most rapid growth occurring by  
52 E14.5. At E14.5 to E15.5, the tissue undergoes a remarkable transition to a columnar epithelium  
53 and the process of villus formation, elongation, and maturation occurs at E15.5 to E18.5 (Chin et  
54 al., 2017; Walton et al., 2016a; Wells and Spence, 2014). The mechanisms triggering this  
55 embryonic to fetal transition in the developing gut remain unclear.

56 A shift in transcription factor regulatory networks accompanies the majority of known cellular  
57 transitions (Niwa, 2018; Wilkinson et al., 2017). Transcription factors function at distal genomic  
58 regulatory regions known as enhancers, which are the primary drivers of tissue-specific gene  
59 expression (Consortium, 2012; Nord et al., 2013; Shen et al., 2012; Visel et al., 2009). In our  
60 efforts to understand mechanisms driving developmental transitions in the gut, we recently  
61 mapped chromatin profiles of esophagus, forestomach, hindstomach and small intestine over  
62 developmental time. We noted a clear transition in chromatin accessibility within the  
63 developing intestine that corresponds to the stage in which the morphogenetic events  
64 reshaping the intestine occur (~E15.5). The transcription factor, CDX2, operates on both sides of  
65 this developmental transition. In the early embryonic intestine (prior to E13.5), CDX2 is required  
66 for intestinal specification, and loss of CDX2 leads to ectopic features of stomach and  
67 esophageal tissues in the intestine (Banerjee et al., 2018; Gao et al., 2009; Grainger et al., 2010;  
68 Kumar et al., 2019). Acute inactivation of CDX2 at later developmental timepoints (post-E13.5)  
69 compromises mature tissue functions, but intestinal identity is maintained (Banerjee et al.,  
70 2018; Kumar et al., 2019; Verzi et al., 2011). While CDX2 is a clear driver of intestinal  
71 specification and plays an additional role in driving fetal maturation, it remains unclear how this  
72 developmental transition occurs.

73 Here, we aim to find transcription factors that could function specifically in intestinal  
74 maturation. We find that genomic regions that become increasingly accessible at fetal stages are  
75 most enriched for DNA-binding motifs known to bind to the HNF4 transcription factor family. In  
76 adult intestine, HNF4A and HNF4G have been shown to drive expression of genes important for  
77 digestive physiology (Boyd et al., 2009; Cattin et al., 2009; Lindeboom et al., 2018). HNF4A  
78 binding activity is modulated by the microbiome (Davison et al., 2017) and suppressed in a  
79 mouse model of ulcerative colitis (Chahar et al., 2014). We recently demonstrated that HNF4A  
80 and HNF4G redundantly drive enterocyte identity in adult tissues (Chen et al., 2019). However,

81 while HNF4 transcription factors have been studied in a number of developmental contexts,  
82 their redundant functions have not been assayed in the context of the developing gut.

83 *Hnf4α* deletion is embryonically lethal, with defects in visceral endoderm (VE) (Chen et al., 1994;  
84 Duncan et al., 1997). Complementation of *Hnf4α*<sup>-/-</sup> embryos with *Hnf4α*<sup>+/+</sup> VE by tetraploid  
85 aggregation (Duncan et al., 1997; Li et al., 2000) or conditional deletion of *Hnf4α* (Babeu et al.,  
86 2009; Garrison et al., 2006; Parviz et al., 2003) allowed for the investigation of HNF4 function in  
87 later developmental stages. In the liver, *Hnf4α* was dispensable for liver specification but was  
88 essential for hepatocyte differentiation (Hayhurst et al., 2001; Li et al., 2000; Parviz et al., 2003).  
89 However, no consequence of HNF4A loss in the developing small intestinal epithelium has been  
90 observed. This may be due to an inefficient depletion in the small intestine due to the mosaic  
91 action of the *Foxa3-Cre* driver, as suggested by Garrison *et al.* (Garrison et al., 2006). Inactivation  
92 of conditional *Hnf4α* alleles using the *Villin-Cre* driver resulted in no embryonic phenotype  
93 (Babeu et al., 2009), possibly due to the relatively late onset of *Villin-Cre* expression (Madison et  
94 al., 2002) or unappreciated genetic redundancy with *Hnf4γ*. Here, we demonstrate that  
95 intestinal expression of the *Hnf4* paralogs is induced during the embryonic to fetal transition,  
96 and that *Hnf4* genes depend upon CDX2 for expression in both mice and humans. Analysis of  
97 chromatin accessibility and ChIP-seq data in the developing and adult gut supports a model in  
98 which the transcription factor CDX2 activates *Hnf4* gene expression, and together HNF4 and  
99 CDX2 drive tissue maturation by activating genes important for intestinal function in post-natal  
100 life. Finally, we generate a mouse model lacking HNF4 factors in the embryonic intestine to  
101 show that while HNF4 factors are dispensable for intestinal specification and villus  
102 morphogenesis, they are critical for maturation of the fetal intestine.

## 103 RESULTS

### 104 Chromatin landscapes indicate that HNF4 factors are more likely to function in intestinal 105 maturation than specification

106 Deciphering the mechanisms of tissue maturation is a critical goal in understanding  
107 developmental disorders and facilitating efforts in regenerative medicine. Developmental  
108 transitions are accompanied by changes in chromatin accessibility and transcription factor  
109 regulatory networks. To better understand the regulatory mechanisms driving intestinal  
110 maturation, we re-analyzed ATAC-seq data (Banerjee et al., 2018) to identify chromatin-  
111 accessible regions in isolated intestinal epithelial cells (Fig.1A). Three categories of accessible  
112 regions were identified (MACS *P* value ≤ 10<sup>-5</sup>). 2,644 regions (cluster 1) were accessible at E11.5  
113 and remained accessible at all stages examined. 10,544 regions (cluster 2, “maturation enriched  
114 regions”) of intestinal chromatin are progressively accessible, whereas 30,702 regions (cluster 3,  
115 “embryo enriched regions”) lose accessibility from E11.5 to adult (Fig.1A, Table S1). Notably, a  
116 gain in accessibility at “maturation enriched regions” coincides with the loss of accessibility at  
117 “embryo enriched regions”. This E14.5-16.5 stage is marked by a transition of the intestinal  
118 epithelium from a pseudostratified to columnar tissue. To identify the regulatory complexes  
119 likely operating during this developmental transition, we applied DNA-binding motif analysis.  
120 Regions selectively accessible in the maturing gut exhibit HNF4A/G as the top-scoring motif  
121 (Fig.1B, Table S1), suggesting that HNF4 factors function in maturation of the developing gut.

122 Conversely, CDX2 is the most prevalent transcription factor motif in the 30,702 regions that are  
123 more accessible in embryonic epithelium (Fig.1B, Table S1). H3K27ac (Kazakevych et al., 2017),  
124 which marks active enhancer regions, is enriched at stage-specific accessible chromatin regions  
125 defined by ATAC-seq (Fig.1C), corroborating putative regulatory function of these regions. Gene  
126 ontology analysis suggests that genes nearby the accessible regions of the early embryonic  
127 intestine function in intestinal specification and morphogenesis, whereas genes nearby  
128 accessible chromatin in the maturing intestine exhibit function consistent with the mature tissue  
129 (Fig.1D, Table S1). DNA-binding motif enrichment analysis at each timepoint revealed that while  
130 CDX2 binding motifs are enriched as early as E11.5, HNF4 binding motifs are first detected at  
131 E14.5 and become more prevalent at accessible chromatin regions of fetal and adult stages  
132 (Fig.S1A). Mirroring their motif enrichment profiles, we find that *Cdx2* transcripts are highly and  
133 equally expressed across early embryonic to adult stages, whereas *Hnf4* transcripts are not  
134 robustly expressed until fetal and adult stages (Fig.1E). Protein expression levels of HNF4 factors  
135 (Fig.S1B,C) appear to increase over developmental time, consistent with the increase in  
136 transcript levels. Similarly, human *CDX2* expression is observed upon intestinal specification of  
137 hESC-derived endoderm by FGF and WNT, whereas expression of *HNF4A* and *HNF4G* is not  
138 observed until cultures are further matured into human intestinal organoids (Fig.1F, Fig.S1D).  
139 Taken together, the chromatin landscapes, DNA motif enrichment, and expression profiles of  
140 intestinal epithelial cells across developmental time suggest that HNF4 factors are more likely to  
141 function in tissue maturation than intestinal specification.

#### 142 **HNF4 factors are dispensable for intestinal specification and villus morphogenesis, and CDX2** 143 **functions upstream of HNF4 factors**

144 To test the function of HNF4 in the developing gut, we deleted a conditional allele of *Hnf4α*  
145 (Hayhurst et al., 2001) in the gut endoderm using the *Shh-Cre* driver (Harfe et al., 2004), which is  
146 activated in the intestinal epithelium starting at ~E9.5. We also examined germline null  
147 embryos lacking *Hnf4γ* mediated by CRISPR knockout (Chen et al., 2019), and embryos with  
148 both HNF4 paralogs simultaneously deleted (hereafter referred to *Hnf4α<sup>KO</sup>*, *Hnf4γ<sup>KO</sup>*, and  
149 *Hnf4αγ<sup>DKO</sup>*, Fig.S1E,F). As we and others have reported (Banerjee et al., 2018; Gao et al., 2009;  
150 Grainger et al., 2010; Kumar et al., 2019), *Cdx2<sup>KO</sup>* in the early embryonic gut epithelium leads to  
151 an intestine exhibiting hindstomach characteristics (ATPase and foveolar PAS positive cells) in  
152 the jejunum and stratified squamous esophageal characteristics (p63 positive cells) in the ileum.  
153 However, similar characteristics are not observed in the *Hnf4αγ<sup>DKO</sup>* embryos (Fig.2A,B),  
154 suggesting that HNF4 factors are dispensable for intestinal specification. These findings are  
155 consistent with the analysis of accessible chromatin (see above, Fig.1), in which CDX2, but not  
156 HNF4, motifs are enriched at regulatory regions most active in the embryonic intestine (Fig.1B,  
157 Fig.S1A).

158 Since CDX2 is required for intestinal specification but HNF4 factors appear dispensable, we  
159 hypothesized that CDX2 may function upstream of HNF4 factors. Examination of CDX2 ChIP-seq  
160 revealed that CDX2 binds to loci of *Hnf4α* and *Hnf4γ* at E13.5 and the ChIP-seq signal  
161 strengthens at E16.5 (ChIP-seq panel in Fig.2C). Loss of CDX2 results in loss of the chromatin  
162 accessibility at the gene loci of *Hnf4* factors (ATAC-seq panel in Fig.2C) and reduced *Hnf4*  
163 transcript (Fig.2D) and protein levels (Fig.2E), suggesting that CDX2 is a direct activator of

164 *Hnf4α*. *Hnf4γ* expression is similarly dependent upon CDX2 (Fig.2C-E); although due to the later  
165 onset of *Hnf4γ* expression, these differences first become apparent at E16.5 (Fig.2D). In  
166 developing human intestine, HNF4 factor expression is similarly dependent upon CDX2, as  
167 reflected by measurement of *HNF4* transcript levels in human intestinal organoids derived from  
168 control or *CDX2<sup>CrisprKO</sup>* hESCs (Fig.2F). These results indicate that expression of HNF4 factors is  
169 dependent upon CDX2 during fetal maturation of the intestine.

170 CDX2 binds to both maturation enriched and embryo enriched regions of intestinal accessible  
171 chromatin (ATAC-seq regions from Fig.1A) at E13.5. When the intestine is mature, the CDX2 and  
172 HNF4 ChIP-seq signal is most robust at maturation enriched regions, with comparatively less  
173 binding at embryonic-accessible regions (Fig.3A,B), suggesting that these factors work to  
174 activate maturation-specific gene expression. Consistent with this idea, genes such as *Myo7b*  
175 and *Pls1* (Fig.3C), which are bound by both HNF4 and CDX2, exhibit increased transcript  
176 expression during tissue maturation. To test whether HNF4 and CDX2 function is required for  
177 chromatin accessibility at regions that become increasingly accessible in the fetal stages, we  
178 compared ATAC-seq signal in control and mutant embryos. Chromatin accessibility is indeed  
179 compromised at maturation enriched regions from the intestinal epithelium of both E16.5  
180 *Cdx2<sup>KO</sup>* and *Hnf4α<sup>DKO</sup>* (Fig.4A-E). Chromatin accessibility loss in these mutants is selective to  
181 maturation-enriched chromatin, as chromatin accessibility at promoters is unaltered, and serves  
182 as an internal control. Taken together, these data suggest an active role of CDX2 and HNF4  
183 factors in binding and maintaining accessibility at maturation-accessible regions.

184 HNF4 factors thus appear dispensable for tissue specification, but their expression pattern and  
185 control of maturation-enriched regulatory regions suggest potential roles during later  
186 developmental stages. From E14.5 to E15.5, the pseudostratified intestinal epithelium resolves  
187 to a cuboidal epithelium, and mesenchymal cells crosstalk with epithelial cells to initiate villus  
188 formation (Chin et al., 2017; Walton et al., 2016a; Wells and Spence, 2014). For example,  
189 PDGFRα-expressing mesenchymal clusters serve as signaling centers for villus morphogenesis  
190 (Walton et al., 2012). We investigated whether villus morphogenesis is disrupted upon HNF4  
191 loss. At E15.5, *Hnf4α<sup>DKO</sup>* intestines are similar to their littermate controls (Fig.5A), and there are  
192 no obvious defects in epithelial morphology, mesenchymal condensations (PDGFRα positive  
193 cells), or proliferation (BrdU positive cells) upon HNF4 loss at E14.5 (Fig.5B). These results  
194 suggest that proliferation and tissue morphogenesis initiate properly in the absence of HNF4  
195 paralogs. Consistent with the observation of normal villus morphogenesis in HNF4 mutants,  
196 adult HNF4 bound-regions (defined by ChIP-seq, Chen et al., 2019) are not very accessible during  
197 embryonic stages, but become markedly more accessible following villus morphogenesis  
198 (Fig.5C,D). Chromatin accessibility at promoter regions serves as an internal control for each  
199 timepoint (Fig.5C,D). Genes linked to HNF4-ChIP-seq regions also exhibit increased expression  
200 after villus morphogenesis, as the tissue matures (RNA-seq, Fig.5E). Together, these findings  
201 suggest that HNF4 likely functions after villus morphogenesis to drive gene expression during  
202 the maturation of the developing fetal gut.

### 203 **HNF4 factors are redundantly required for fetal maturation of the intestine**

204 From E15.5 to E18.5, villi elongate into the lumen and cells that leave the intervillus regions exit  
205 the cell cycle and begin to express markers of differentiation. To better appreciate the function



206 of HNF4 factors during this timepoint, we compared ATAC-seq on E16.5 intestinal epithelial cells  
207 isolated from *Hnf4α<sup>γ</sup><sup>DKO</sup>* and control embryos. 5,391 accessible chromatin regions lose  
208 accessibility upon HNF4 loss (cluster 2 in **Fig.6A**, **Table S2**). Genes nearby these HNF4-dependent  
209 regions are associated with mature intestinal functions, such as adhesion, brush border  
210 formation, and lipid metabolism (**Fig.6B**, **Table S2**). For example, chromatin accessibility  
211 increases at regions of the brush border gene *Enpep* as the tissue matures (**Fig.6C**), and  
212 accessibility is almost completely lost in the *Hnf4α<sup>γ</sup><sup>DKO</sup>* epithelium (**Fig.6D**). HNF4 paralogs  
213 directly bind to many maturation-specific genes (ChIP-seq in **Fig.6E** and **Fig.S2**), and transcript  
214 levels of these maturation-specific genes are dramatically reduced in *Hnf4α<sup>γ</sup><sup>DKO</sup>* (**Fig.6F**).

215 Consistent with the loss of expression of maturation genes, *Hnf4α<sup>γ</sup><sup>DKO</sup>* intestines exhibit a  
216 translucent and distended lumen at E18.5, suggesting an underdeveloped intestine compared to  
217 their littermate controls (**Fig.6G**). The gross morphological defects in intestines are more severe  
218 with loss of 3 or 4 *Hnf4* alleles compared to loss of 1 or 2 *Hnf4* alleles (**Fig.S3A**). After birth,  
219 *Hnf4α<sup>γ</sup><sup>DKO</sup>* pups are not able to survive, whereas *Hnf4α<sup>γ</sup><sup>+/−</sup>* pups can survive but exhibit growth  
220 retardation (**Fig.S3B,C**), which may be due to incomplete intestinal maturation. At E18.5, villi are  
221 noticeably shorter in mutants lacking 3 or 4 *Hnf4* alleles but not in the *Hnf4* single mutants or  
222 controls (**Fig.6H**, **Fig.S3D**), suggesting that HNF4 paralogs are redundantly required for villus  
223 elongation and extension into the developing gut lumen. There is no obvious increase in  
224 apoptosis in *Hnf4α<sup>γ</sup><sup>DKO</sup>*, as evaluated by cleaved caspase 3 staining (**Fig.S4A**). The differentiation  
225 marker, alkaline phosphatase, which is localized to the apical surface of villus enterocytes, is  
226 normally expressed in the controls beginning at E15.5 in the maturing tissue and increases over  
227 developmental time (top panels in **Fig.6I**). However, alkaline phosphatase is not detectable in  
228 *Hnf4* double mutants (bottom panels in **Fig.6I**). As expected for genetic redundancy between  
229 *Hnf4* paralogs, *Hnf4* single mutants show normal expression of alkaline phosphatase (**Fig.S4B**).  
230 Proliferative cells, which are normally restricted to the intervillus regions of the fetal gut, are  
231 expanded into the villi of *Hnf4α<sup>γ</sup><sup>DKO</sup>* (**Fig.S4C**), which may be attributed to the loss of villus  
232 differentiation in mutants lacking HNF4 factors (**Fig.6I,J**). Taken together, our results indicate  
233 that HNF4 paralogs are dispensable for specification and villus morphogenesis in the developing  
234 gut, but are redundantly required for fetal maturation through direct binding to fetal maturation  
235 genes.

## 236 DISCUSSION

237 The regulatory mechanisms governing the transition of embryonic to mature tissue is a  
238 significant frontier for both developmental biology and regenerative medicine. Chromatin  
239 accessibility dynamics across intestinal development provide new insights into the fundamental  
240 molecular basis of intestinal specification and maturation. HNF4 motifs are most prevalent in  
241 the accessible chromatin during the maturation of the developing gut, and we provide evidence  
242 that HNF4 transcription factors are indeed important for maturation of the fetal intestine. Here,  
243 we build a model that CDX2 functions in gut specification, binds to and activates HNF4 factors in  
244 the developing gut. Together, these factors are required to mature the fetal tissue, ultimately  
245 achieving a stabilized and mature intestine.

246 Interestingly, lower-level CDX2 binding in the embryo is observed at regions that will become  
247 accessible in fetal stages. (Fig.3A). Lower level CDX2 ChIP-signal at these poorly accessible  
248 regions could reflect a “low-level sampling” behavior that has recently been described for the  
249 FOXA1 transcription factor (Donaghey et al., 2018). When ectopically expressed in fibroblasts,  
250 FOXA1 exhibits low ChIP-seq signal at binding sites typically exclusive to other cell lineages, such  
251 as liver or endoderm, a behavior that could relate to FOXA1’s relatively strong interaction with  
252 chromatin and slow nuclear mobility compared to other transcription factors (Sekiya et al.,  
253 2009). Low-level FOXA1 binding is strengthened at these sites by co-expression of partner factor  
254 GATA4. HNF4 factors could similarly be stabilizing CDX2 at maturation-specific regions. A  
255 potential partner for CDX2 at embryo-specific regions remains elusive. It will be interesting to  
256 test whether CDX2 exhibits similar nuclear mobility as FOXA1.

257 It is also interesting to note that CDX2 appears to function in both the embryonic and fetal  
258 transcription factor regulatory networks (Fig.7). Transitions between regulatory networks could  
259 more seamlessly occur when certain factors are present across the transition, such as the  
260 presence of *Sox2* and *Esrrb* in both embryonic stem cells and trophoblast stem cells (Adachi et  
261 al., 2013). Rather than to shut down an entire set of transcription factors and establish an  
262 entirely new set of factors, the common presence of CDX2 might function as a placeholder to  
263 transition from the embryonic to fetal networks. Inhibitory factors have also been shown to play  
264 a role in tissue maturation, such as *Blimp1* (Harper et al., 2011; Mould et al., 2015).

265 Transcription factors and developmental signaling pathways function in complex and  
266 collaborative networks to promote proper tissue development and function. BMP signals control  
267 intestinal villus patterning (Walton et al., 2016b) and intestinal looping (Nerurkar et al., 2017),  
268 but the functions and mechanisms of BMP signals in villus maturation are not fully explored. In a  
269 recent study, we identify a reinforcing feed-forward loop of BMP/SMAD signaling and HNF4,  
270 which promotes and stabilizes enterocyte cell identity in the adult intestine (Chen et al., 2019).  
271 Future studies can also investigate the presence of this reinforcing loop of BMP/SMAD signaling  
272 and HNF4 in the developing gut, and whether it promotes the maturation of the developing  
273 intestine or stabilization of mature transcription factor networks. These findings will build on the  
274 field’s knowledge of intestinal development and may help influence efforts of regenerative  
275 medicine to provide healthy intestinal tissue to patient populations.

## 276 MATERIALS AND METHODS

### 277 Mice

278 The *Shh-Cre* transgene (Harfe et al., 2004), *Cdx2<sup>ff</sup>* (Verzi et al., 2010), *Hnf4 $\alpha$ <sup>ff</sup>* (Hayhurst et al.,  
279 2001), and *Hnf4 $\gamma$ <sup>Crispr/Crispr</sup>* (Chen et al., 2019) alleles were bred to achieve the indicated  
280 genotypes. The *Shh-Cre*<sup>-</sup> embryos served as littermate controls unless otherwise indicated. The  
281 day on which a vaginal plug was found was considered to be E0.5. Embryonic tail biopsies were  
282 used for rapid genotyping using KAPA Mouse Genotyping Kits (Kapa Biosystems, KK7352). All  
283 mouse protocols and experiments were approved by the Rutgers Institutional Animal Care and  
284 Use Committee. All samples were collected between 12:00 and 14:00 to avoid circadian  
285 variability.

286

## 287 **Histology and Immunostaining**

288 Intestinal tissues were fixed with 4% paraformaldehyde at 4°C overnight, washed with PBS, and  
289 dehydrated through ascending alcohols prior to paraffin embedding. 5 µm thick paraffin  
290 sections were used for histological staining. Hematoxylin (VWR, 95057-858) and eosin (Sigma,  
291 HT110180) staining was performed using standard procedures. Alkaline phosphatase activity  
292 was detected using the AP Staining Kit II (Stemgent). For Periodic Acid-Schiff (PAS) staining,  
293 slides were incubated in 0.5% periodic acid and stained with Schiff's Reagent (Alfa Aesar,  
294 J612171). In the case of tissue prepared for BrdU immunohistochemistry, the pregnant female  
295 mice were injected with 1 mg BrdU, and embryos were harvested 1h after injection.  
296 Immunohistochemistry was performed using primary antibodies against HNF4A (Santa Cruz sc-  
297 6556 X, 1:2000), HNF4G (Santa Cruz sc-6558 X, 1:2000), ATPase (MBL International Corp. D032-  
298 3, 1:200), P63 (Santa Cruz sc-8343, 1:500), BrdU (Bio-Rad MCA2060, 1:500), Ki67 (Abcam  
299 ab16667, 1:300), PDGFR $\alpha$  (Santa Cruz sc-338, 1:1000), Cleaved Caspase 3 (Cell Signaling 9661,  
300 1:200), and Keratin 20 (Cell Signaling 13063, 1:2500). After incubating with secondary antibody  
301 and the Vectastain ABC HRP Kit (Vector Labs), slides were developed using 0.05% DAB (Amresco  
302 0430) and 0.015% hydrogen peroxide in 0.1 M Tris. After mounting, the slides were viewed on a  
303 Nikon Eclipse E800 microscope. Images were photographed with a Retiga 1300 CCD (QImaging)  
304 camera using QCapture imaging software. When adjustments of sharpness, contrast, or  
305 brightness were made, they were applied uniformly for comparative images.

## 306 **Human embryonic stem cell (hESC) culture and differentiation**

307 All hESCs work was reviewed and approved by the University of Michigan human pluripotent  
308 stem cell research oversight committee (HPSCRO). The hESC cell line H9 (WA09, NIH stem  
309 registry #0062) was obtained from the WiCell Research Institute. *CDX2<sup>CrisprKO</sup>* hESCs were  
310 generated as described previously (Kumar et al., 2019). hESCs were maintained and  
311 differentiated into endoderm, hind/midgut and human intestinal organoids as published  
312 previously (Kumar et al., 2019; Tsai et al., 2017).

## 313 **Intestinal epithelial cell isolation**

314 Embryos were collected at E18.5, and the freshly harvested embryonic small intestine (caudal  
315 stomach to rostral caecum) was opened longitudinally with forceps, cut into 1 cm pieces, and  
316 then rotated in 3 mM EDTA in PBS at 4 °C for 40 min. To release the epithelial cells from  
317 underlying muscular tissue, the tissue was vigorously shaken after EDTA incubation. The  
318 supernatant was collected as the whole epithelium fraction. Cells were pelleted by  
319 centrifugation at 170 g at 4 °C and then washed with cold PBS, and processed for RNA extraction  
320 using Trizol (Invitrogen, 15596018) according to the manufacturer's protocols.

## 321 **RNA extraction and qRT-PCR**

322 The RNA was reverse transcribed using SuperScript III First-Strand Synthesis SuperMix  
323 (Invitrogen, 18080-400) with Oligo(dT)<sub>20</sub> primers to prepare cDNA. qRT-PCR analysis was  
324 performed using gene-specific primers and SYBR Green PCR Master Mix (Applied Biosystems,  
325 4309155). The sequences of the primers used are available upon request. The 2<sup>- $\Delta\Delta$ Ct</sup> method was  
326 applied to calculate the fold change of relative transcript levels, and *Hprt1* was used for  
327 normalization.

## 328 **Single intestinal epithelial cell isolation for ATAC-seq**

329 Embryos were collected at E16.5, and the freshly harvested embryonic small intestine (caudal  
330 stomach to rostral caecum) was opened longitudinally with forceps and cut into 1 cm pieces.  
331 Intestinal tissues were treated with pre-warmed 0.25% Trypsin for 8 min at 37°C on a vortex



332 station (speed set between 6-7), neutralized with 10% FBS, and passed through a 70- $\mu$ m cell  
333 strainer. Cells were stained with the anti-CD326 (EpCAM) magnetic microbeads antibody  
334 (Miltenyi Biotec, 130-105-958) for 40 min on ice. To obtain single magnetic antibody conjugated  
335 EpCAM positive epithelial cells, stained cells were passed through a 40- $\mu$ m cell strainer and then  
336 collected over a MS column (Miltenyi Biotec, 130-042-201) in a magnetic field. 20,000 cells were  
337 used for ATAC-seq as described previously (Buenrostro et al., 2013; Buenrostro et al., 2015) with  
338 slight modifications. Briefly, cells were resuspended in ice-cold lysis buffer (10 mM Tris, pH 7.4,  
339 10 mM NaCl, 3 mM MgCl<sub>2</sub>, and 0.1% NP-40), and then centrifuged at 500 g for 10 min at 4°C.  
340 The isolated nuclei were incubated with Nextera Tn5 Transposase (Illumina FC-121-1030) at  
341 37°C for 30 min. The transposed chromatin was purified with QIAquick PCR Purification Kit  
342 (QIAGEN), and PCR was amplified with high-fidelity 2X PCR Master Mix (New England Biolabs  
343 M0541). One-third of the maximum fluorescent intensity was used to determine the additional  
344 cycles. The PCR amplified libraries were purified, and fragment size was selected using Pippin  
345 Prep and sequenced on Illumina NextSeq 550.

#### 346 **Bioinformatics analysis**

347 For ATAC-seq and ChIP-seq analysis, raw sequencing reads (fastq) were quality checked using  
348 fastQC (v0.11.3) and were further aligned to mouse (mm9) genomes using bowtie2 (v2.2.6)  
349 (Langmead and Salzberg, 2012) to obtain bam files. DeepTools bamCoverage (Ramirez et al.,  
350 2016) (v2.4.2, duplicate reads ignored, RPKM normalized and extended reads) was used to  
351 generate bigwig files from bam files, and BigWigMerge (v2) was used to merge the bigwig files  
352 of different replicates. MACS (v1.4.1) (Zhang et al., 2008) was used for peak calling and to  
353 generate bed files from bam files, and BEDTools (v2.17.0) (Quinlan, 2014) was used to merge,  
354 intersect or subtract the intervals of bed files. Promoters were defined within 2 kb of the  
355 transcription start sites of RefSeq genes, and enhancers were defined by excluding promoters.  
356 Haystack (v0.4.0) (Pinello et al., 2018) quantile normalized bigwigs were used to create *k*-means  
357 clustering heatmaps of ATAC-seq using computeMatrix and plotHeatmap from deepTools  
358 (v2.4.2) (Ramirez et al., 2016). Genomic regions of desired *k*-means clusters were extracted from  
359 bed files generated by plotHeatmap for further analysis. Homer findMotifsGenome.pl (v4.8.3,  
360 homer *de novo* Results) (Heinz et al., 2010) was used to identify transcription factor motifs  
361 enriched at peaks. Genes associated with peaks were identified using the peak2gene/BETA-  
362 minus function (v1.0.2) in Cistrome tools (Liu et al., 2011). Enriched gene ontologies were  
363 identified from genomic regions (bed file) using GREAT analysis (v3.0.0) (McLean et al., 2010) or  
364 DAVID (v6.8) (Huang da et al., 2009). SitePro (v1.0.2) (Shin et al., 2009) was used to visualize the  
365 average signals of ChIP-seq in the desired genomic regions. The Integrative Genomics Viewer  
366 (IGV 2.4.13) (Robinson et al., 2011) was used to visualize bigwig tracks.

367 For RNA-seq analysis, raw sequencing reads (fastq) were quality checked using fastQC (v0.11.3),  
368 and were further aligned to mouse (mm9) genomes using Tophat2 (v2.1.0) (Kim et al., 2013) to  
369 generate bam files. Kallisto (v0.44.0) (Bray et al., 2016) was utilized to quantify the transcript  
370 abundances of the RNA-Seq samples through *pseudoalignment*, using single-end reads and an  
371 Ensembl mm9 transcriptome build index. Then, the tximport (v1.8.0) (Soneson et al., 2015)  
372 package was run in R (v3.5.2) to create gene-level count matrices for use with DESeq2 (v1.20)  
373 (Love et al., 2014) by importing quantification data obtained from Kallisto. DESeq2 was then  
374 used to generate RPKM values per kilobase of gene length per million mapped fragments at  
375 each time course point with comparison of *Cdx2*<sup>KO</sup> replicates and wild-type replicates. DESeq2  
376 was also used to generate p-values of gene matches. Genes with FPKM>1, a commonly used  
377 minimal expression threshold, were used for further analysis. Heatmapper (Babicki et al., 2016)

378 was used to display relative transcript levels of genes of interest by using normalized RPKM  
379 values. The Integrative Genomics Viewer (IGV 2.4.13) (Robinson et al., 2011) was used to  
380 visualize bam tracks.

### 381 **Statistical analysis**

382 The data is presented as mean  $\pm$  SEM, and statistical comparisons were performed using two-  
383 sided Student's t-test at  $P < 0.001^{***}$ ,  $P < 0.01^{**}$  or  $P < 0.05^*$ . Bioinformatics related statistical  
384 analysis was done with the embedded statistics in each package, including HOMER (Heinz et al.,  
385 2010), GREAT (McLean et al., 2010), DAVID (Huang da et al., 2009) and DESeq2 (Love et al.,  
386 2014).  $P < 0.05$  (95% confidence interval) was considered statistically significant.

387

### 388 **Acknowledgements**

389 We thank Madhurima Saxena and Ramesh Shivdasani for helpful suggestions and curating  
390 published data. We thank Kenneth Zaret for helpful discussions.

391

### 392 **Competing interests**

393 The authors declare no competing or financial interests.

394

### 395 **Author contributions**

396 L.C. conceived and designed the study, performed benchwork and bioinformatics, collected and  
397 analyzed the data, and wrote the manuscript; N.H.T., S.L., R.P.V. and A.P. contributed to  
398 benchwork. R.A. contributed to bioinformatics; J.R.S and Y-H.T. provided human intestinal  
399 organoid data; M.P.V. conceived, designed and supervised the study, and wrote the manuscript.

400

### 401 **Funding**

402 This research was funded by a grant from the NIH (R01CA190558, M.P.V.). J.R.S and M.P.V are  
403 also supported by the Intestinal Stem Cell Consortium from the National Institute of Diabetes  
404 and Digestive and Kidney Diseases (NIDDK) and National Institute of Allergy and Infectious  
405 Diseases (NIAID) of the National Institutes of Health under grant number U01 DK103141.  
406 Support was also received from the Sequencing Facility of the Rutgers Cancer Institute of New  
407 Jersey (P30CA072720) and the University of Michigan Center for Gastrointestinal Research  
408 (UMCGR) (NIDDK 5P30DK034933). L.C. was supported by New Jersey Commission on Cancer  
409 Research grant (DFHS18PPC051). N.H.T., S.L., R.P.V. and A.P. were supported by MacMillan  
410 Summer Undergraduate Research Fellowships.

411

### 412 **Data availability**

413 All ATAC-seq data of this study have been deposited in GEO (GSE128674). The following secure  
414 token has been created to allow review of record GSE128674: cpgbwsyarrghpeh. The following  
415 datasets from GEO were reanalyzed: The accession numbers for the transcriptome and  
416 chromatin accessibility of time-course WT and *Cdx2*<sup>KO</sup> from our previous studies are GSE115314  
417 (Kumar et al., 2019) and GSE115541 (Banerjee et al., 2018). The accession numbers for the CDX2  
418 ChIP-seq and HNF4 ChIP-seq from our previous studies are GSE34568 (Verzi et al., 2013),  
419 GSE115314 (Kumar et al., 2019) and GSE112946 (Chen et al., 2019). GSE89684 (Kazakevych et  
420 al., 2017) was used to mark active chromatin with the time-course H3K27ac ChIP-seq. The  
421 accession number for the RNA-seq data of differentiation of hESCs into human intestinal  
422 organoids is E-MTAB-4168 (Tsai et al., 2017) in the ArrayExpress database.

423

424 **Supplementary information**

425 **Table S1.** Genome coordinates for ATAC-seq performed in intestinal epithelial cells from E11.5  
426 embryo to adult, including 30,702 embryonic enhancer regions (cluster 3 from **Fig.1A**) and  
427 10,544 maturation enhancer regions (cluster 2 from **Fig.1A**). Additionally, the full list of HOMER  
428 *de novo* motif-calling analysis on these embryonic and maturation enriched regions are reported  
429 respectively. Finally, the results of GO term enrichment using GREAT analysis for genes with  
430 their transcriptional start sites within 20 kb of these embryonic and maturation regions are  
431 reported respectively. These data correspond to findings in **Fig.1**.

432

433 **Table S2.** ATAC-seq performed in intestinal epithelial cells from E16.5 *Hnf4α*<sup>PKO</sup> versus *Hnf4γ*<sup>-/-</sup>  
434 controls. Genome coordinates for 5,391 accessible chromatin regions become inaccessible upon  
435 HNF4 loss (cluster 2 from **Fig.6A**). Additionally, the full list of HOMER *de novo* motif-calling  
436 analysis on these HNF4 chromatin-dependent regions are reported. Finally, the results of GO  
437 term enrichment using DAVID analysis for genes with their transcriptional start sites within 20  
438 kb of these HNF4 chromatin-dependent regions are reported. These data correspond to findings  
439 in **Fig.6**.

440

441

442

443 **Figures and figure legends**

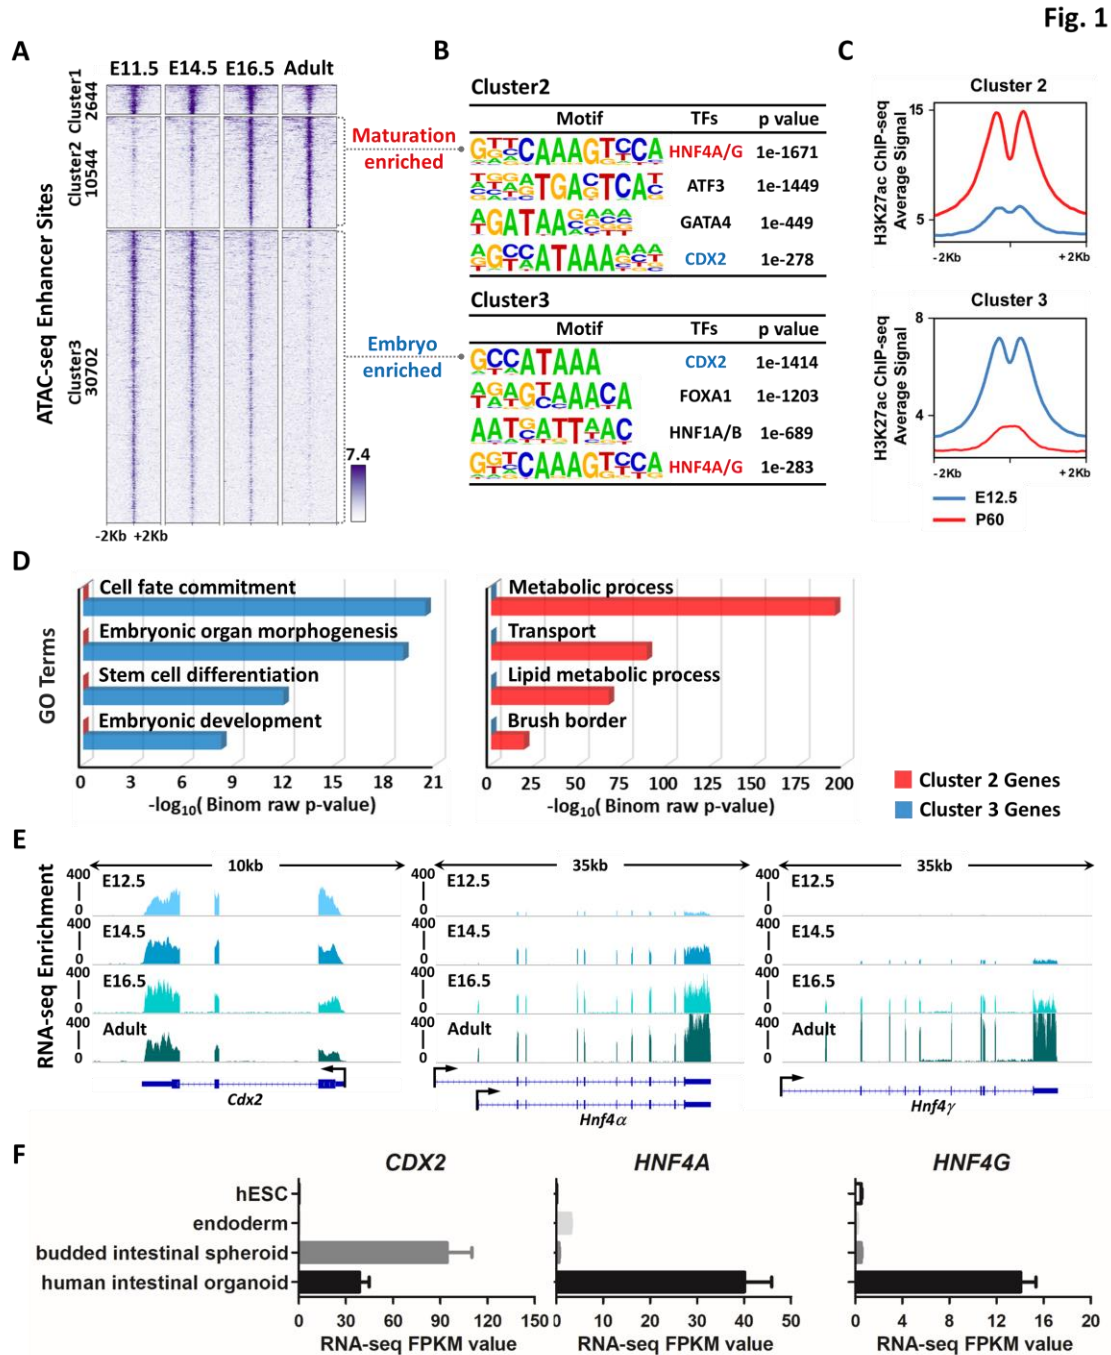

444  
 445 **Fig. 1. Chromatin landscapes indicate that HNF4 factors function in maturation of the**  
 446 **developing gut.** (A) ATAC-seq (GSE115541, n = 2 biological replicates per timepoint, isolated  
 447 embryonic epithelium was collected from the entire small intestine) defined regions of  
 448 accessible chromatin across indicated stages of mouse intestinal epithelium development  
 449 (MACS  $P$  value  $\leq 10^{-5}$ ).  $K$ -means clustering analysis reveals a shift in accessible enhancer  
 450 chromatin of intestinal epithelial cells across developmental time. (B) HOMER *de novo* DNA-  
 451 motif enrichment analysis of ATAC-seq regions (MACS  $P$  value  $\leq 10^{-5}$ ) shows that CDX2 binding

452 sequences are more prevalent in accessible regions of the early embryonic state (embryo  
453 enriched, cluster 3), whereas HNF4 binding sequences are more prevalent in accessible regions  
454 of the fetal and adult states (maturation enriched, cluster 2). (C) H3K27ac ChIP-seq (GSE89684, n  
455 = 2 biological replicates per timepoint) profiles demonstrate that the active chromatin marker is  
456 enriched in a stage-specific manner, corresponding to embryo-specific or P60 adult-specific  
457 accessible regions. (D) GREAT GO term analysis shows distinct gene ontologies of target genes  
458 linked to stage-specific ATAC-seq sites within 20kb. (E) RNA-seq of purified epithelium  
459 (GSE115541, n = 2 biological replicates per timepoint, isolated embryonic epithelium was  
460 collected from the entire small intestine) shows that *Cdx2* is highly and equally expressed across  
461 developmental time, whereas *Hnf4 $\alpha$*  and *Hnf4 $\gamma$*  are not robustly expressed until E14.5 and  
462 E16.5, respectively. (F) RNA-seq (E-MTAB-4168) shows that *CDX2* expression is induced when  
463 human endoderm is specified to intestine by treatment with FGF4 (500 ng/ml) and CHIR99021  
464 (2  $\mu$ M, WNT agonist). By contrast, *HNF4A/G* expression is not induced until human intestinal  
465 organoids are formed by subsequent differentiation steps. See schematic in [Fig.S1D](#) for details  
466 on human intestinal organoid differentiation conditions. Data are presented as mean  $\pm$  SEM. At  
467 least 3 biological replicates are included per stage, and samples from the same stage are  
468 grouped and presented.

469

470



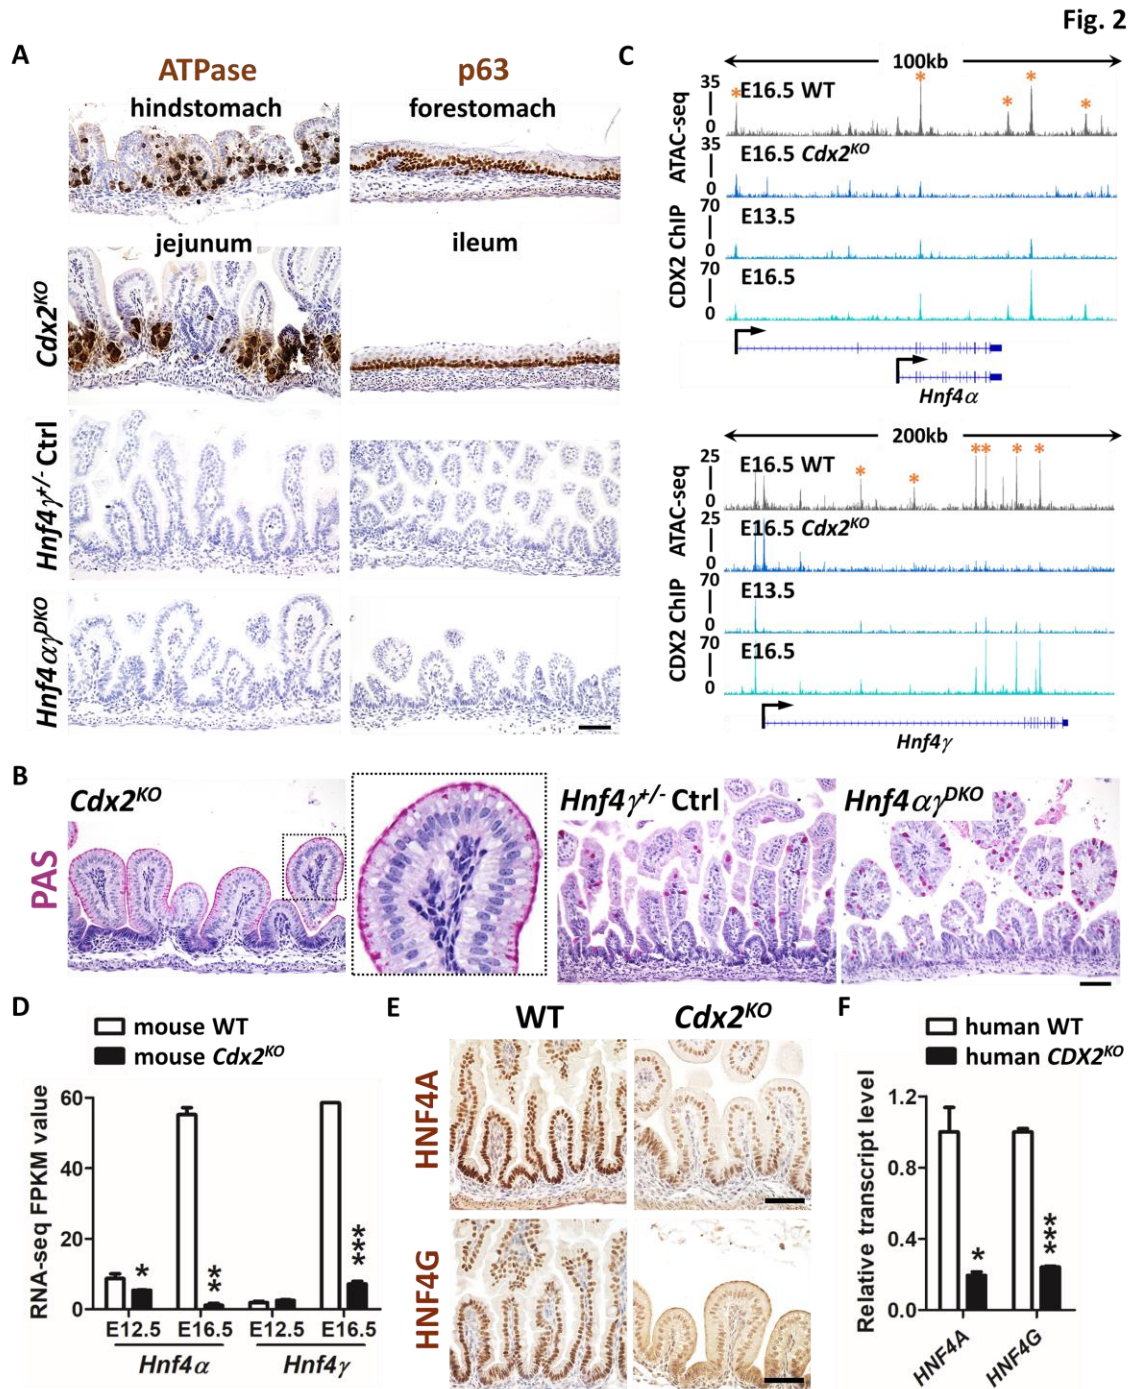

471

472 **Fig. 2. HNF4 is activated by CDX2 in the developing gut, but HNF4 is not required for intestinal**  
 473 **specification.** (A) Immunostaining of ATPase and p63 (representative of 4 biological replicates)  
 474 in E18.5 control, *Shh-Cre;Cdx2*<sup>fl/fl</sup> (*Cdx2*<sup>KO</sup>) and *Shh-Cre;Hnf4*<sup>α<sup>fl/fl</sup>;Hnf4</sup><sup>γ<sup>Crispr/Crispr</sup></sup> (*Hnf4*<sup>αγ</sup><sup>DKO</sup>)  
 475 embryos. The hindstomach marker ATPase is ectopically expressed in the *Cdx2*<sup>KO</sup> jejunum but  
 476 not in the control and *Hnf4*<sup>αγ</sup><sup>DKO</sup> jejunum. The forestomach marker p63 is ectopically expressed  
 477 in the *Cdx2*<sup>KO</sup> ileum (squamous mucosa) but not in the control and *Hnf4*<sup>αγ</sup><sup>DKO</sup> ileum. (B) PAS  
 478 staining indicates that normal intestinal goblet cells are replaced with cells resembling gastric  
 479 foveolar cells (PAS positive cells at apical cell surface) in the *Cdx2*<sup>KO</sup> jejunum of E18.5 embryos,

480 but not in the control or *Hnf4α*<sup>DKO</sup> jejunum (representative of 4 biological replicates). (C) CDX2  
481 binds to *Hnf4α* and *Hnf4γ* loci at E13.5 and E16.5 (CDX2 ChIP, GSE115314, n = 2 biological  
482 replicates, whole small intestine epithelium), and accessible chromatin is compromised at gene  
483 loci of *Hnf4α* and *Hnf4γ* upon CDX2 loss (ATAC-seq, GSE115314, n = 2 biological replicates,  
484 whole small intestine epithelium). Asterisks denote putative regulatory regions. (D) The  
485 transcript levels of *Hnf4α* and *Hnf4γ* are significantly downregulated in the intestinal epithelial  
486 cells of the *Shh-Cre;Cdx2*<sup>KO</sup>. Data are presented as mean ± SEM (RNA-seq, GSE115541, n = 2-3  
487 biological replicates, whole small intestine epithelium). Statistical tests are embedded in DESeq2  
488 at  $P < 0.001$ \*\*\*,  $P < 0.01$ \*\* and  $P < 0.05$ \*). (E) Immunostaining of HNF4A and HNF4G shows  
489 reduced protein levels of HNF4 paralogs in E18.5 *Cdx2*<sup>KO</sup> (representative of 4 biological  
490 replicates). Scale bars, 50 μm. (F) qRT-PCR shows reduced transcript levels of *HNF4A* and *HNF4G*  
491 in human intestinal organoids derived from *CDX2*<sup>CrisprKO</sup> hES cells compared to organoids derived  
492 from control cells. Data are presented as mean ± SEM (n = 3 biological replicates, Student's t-  
493 test, two-sided at  $P < 0.001$ \*\*\* and  $P < 0.05$ \*).  
494  
495

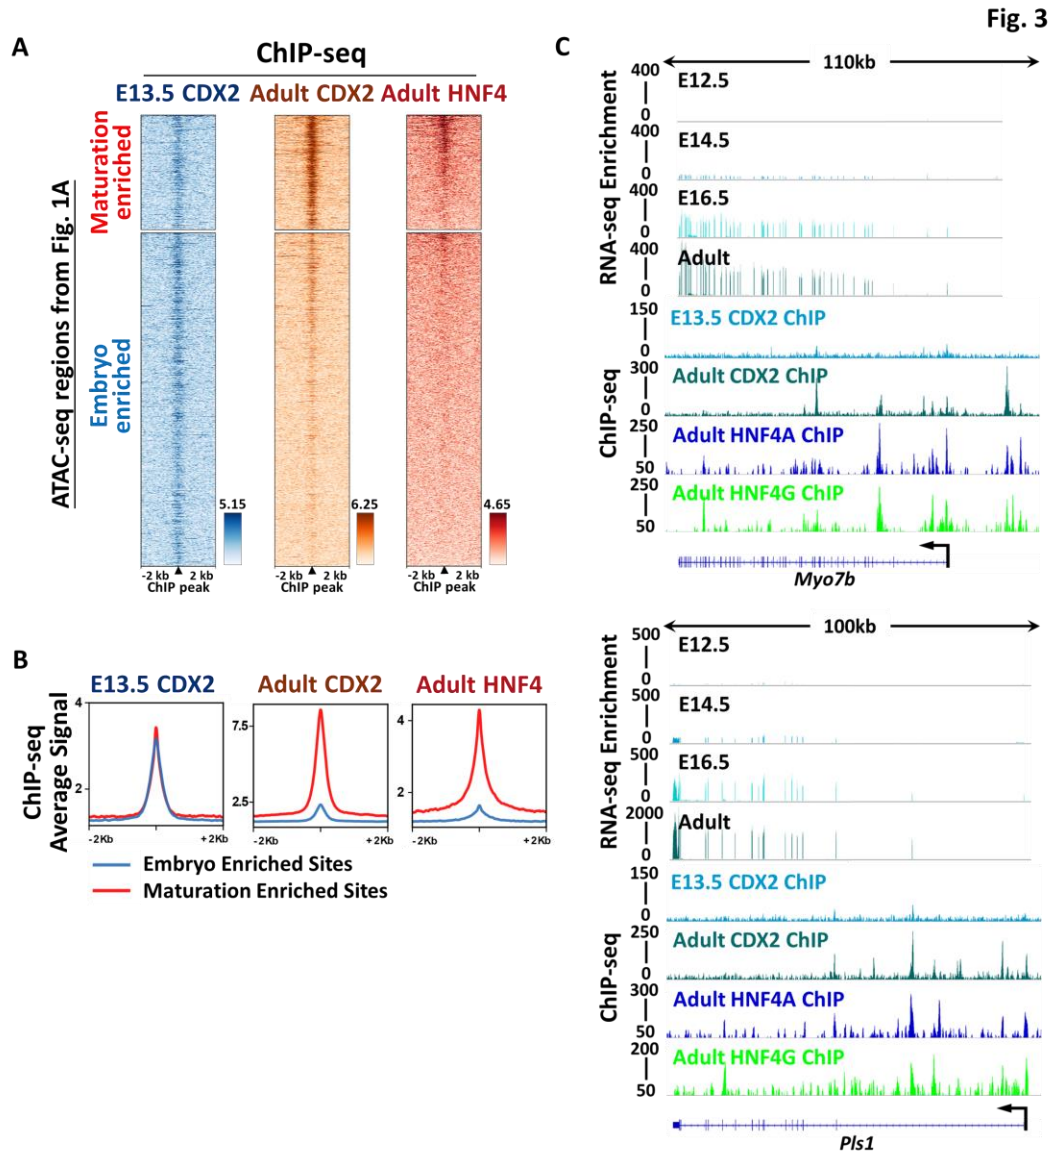

496

498 **Fig. 3. Chromatin regions that become accessible in the fetal tissue are bound by CDX2 and**  
 499 **HNF4. Genes nearby these regions are activated at fetal stages.** (A-B) ChIP-seq profiles show  
 500 that CDX2 (GSE115314, n = 2 biological replicates, whole small intestine epithelium) binds to  
 501 both maturation enriched (cluster 2 of Fig.1A) and embryo enriched (cluster 3 of Fig.1A) regions  
 502 of intestinal accessible enhancer chromatin in E13.5 embryos. When tissues become mature,  
 503 CDX2 (GSE34568 and GSE115314, n = 2 biological replicates) and HNF4 (GSE112946, n = 2  
 504 biological replicates per HNF4A and HNF4G ChIP, adult duodenum epithelium) bind more  
 505 robustly to the maturation enriched regions rather than to the embryo enriched regions. The  
 506 peaks of CDX2 ChIP in the heatmaps are aligned to the binding events of HNF4 ChIP. (C)  
 507 Examples of genes located at maturation enriched regions are visualized using IGV. Brush border  
 508 genes, such as *Myo7b* and *Pls1*, are expressed when maturation occurs at E16.5 and are robustly  
 509 expressed when intestines become mature in the adult (RNA-seq panels, GSE115541, n = 2  
 510 biological replicates). These genes are directly bound by CDX2 (GSE34568 and GSE115314, n = 2  
 511 biological replicates) and HNF4 (GSE112946, n = 2 biological replicates per HNF4A and HNF4G  
 512 ChIP).

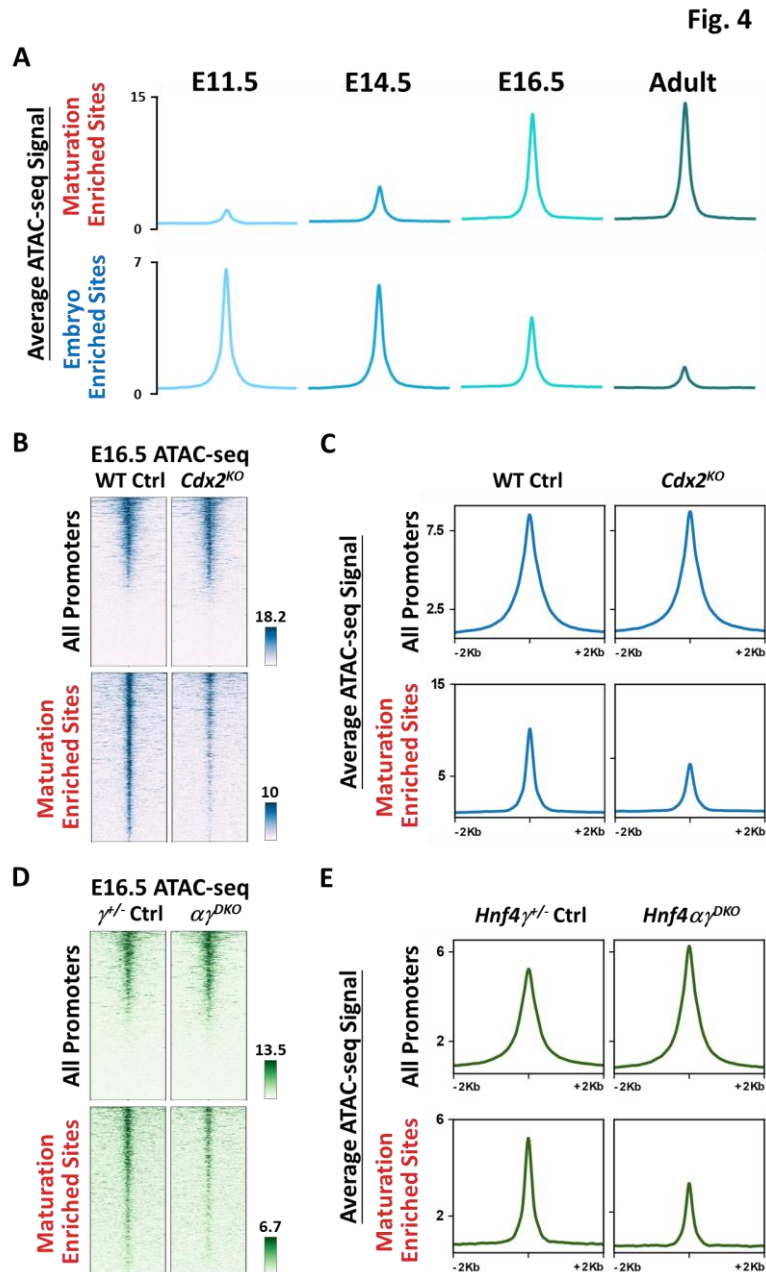

514

515 **Fig. 4. Maturation-enriched regions of accessible enhancer chromatin show loss of**  
 516 **accessibility in the intestinal epithelium of *Cdx2*<sup>KO</sup> and *Hnf4* $\alpha\gamma^{DKO}$  mutants.** (A) The intestinal  
 517 chromatin (GSE115541, n = 2 biological replicates) becomes more accessible at maturation  
 518 enriched regions and less accessible at embryo enriched regions (ATAC-seq regions defined from  
 519 Fig.1A) from E11.5 embryo to adult. The intestinal chromatin accessibility at the maturation  
 520 enriched sites is compromised upon depletion (*Shh-Cre*) of *Cdx2* (B-C, GSE115314) or *Hnf4* (D-E)  
 521 in E16.5 embryos, whereas promoter regions are relatively unaffected and serve as an internal  
 522 control (n = 2 WT controls, 1 *Hnf4* $\gamma^{-/-}$  controls, 2 *Cdx2*<sup>KO</sup> mutants and 2 *Hnf4* $\alpha\gamma^{DKO}$  mutants,  
 523 whole small intestine epithelium).

524



Fig. 5

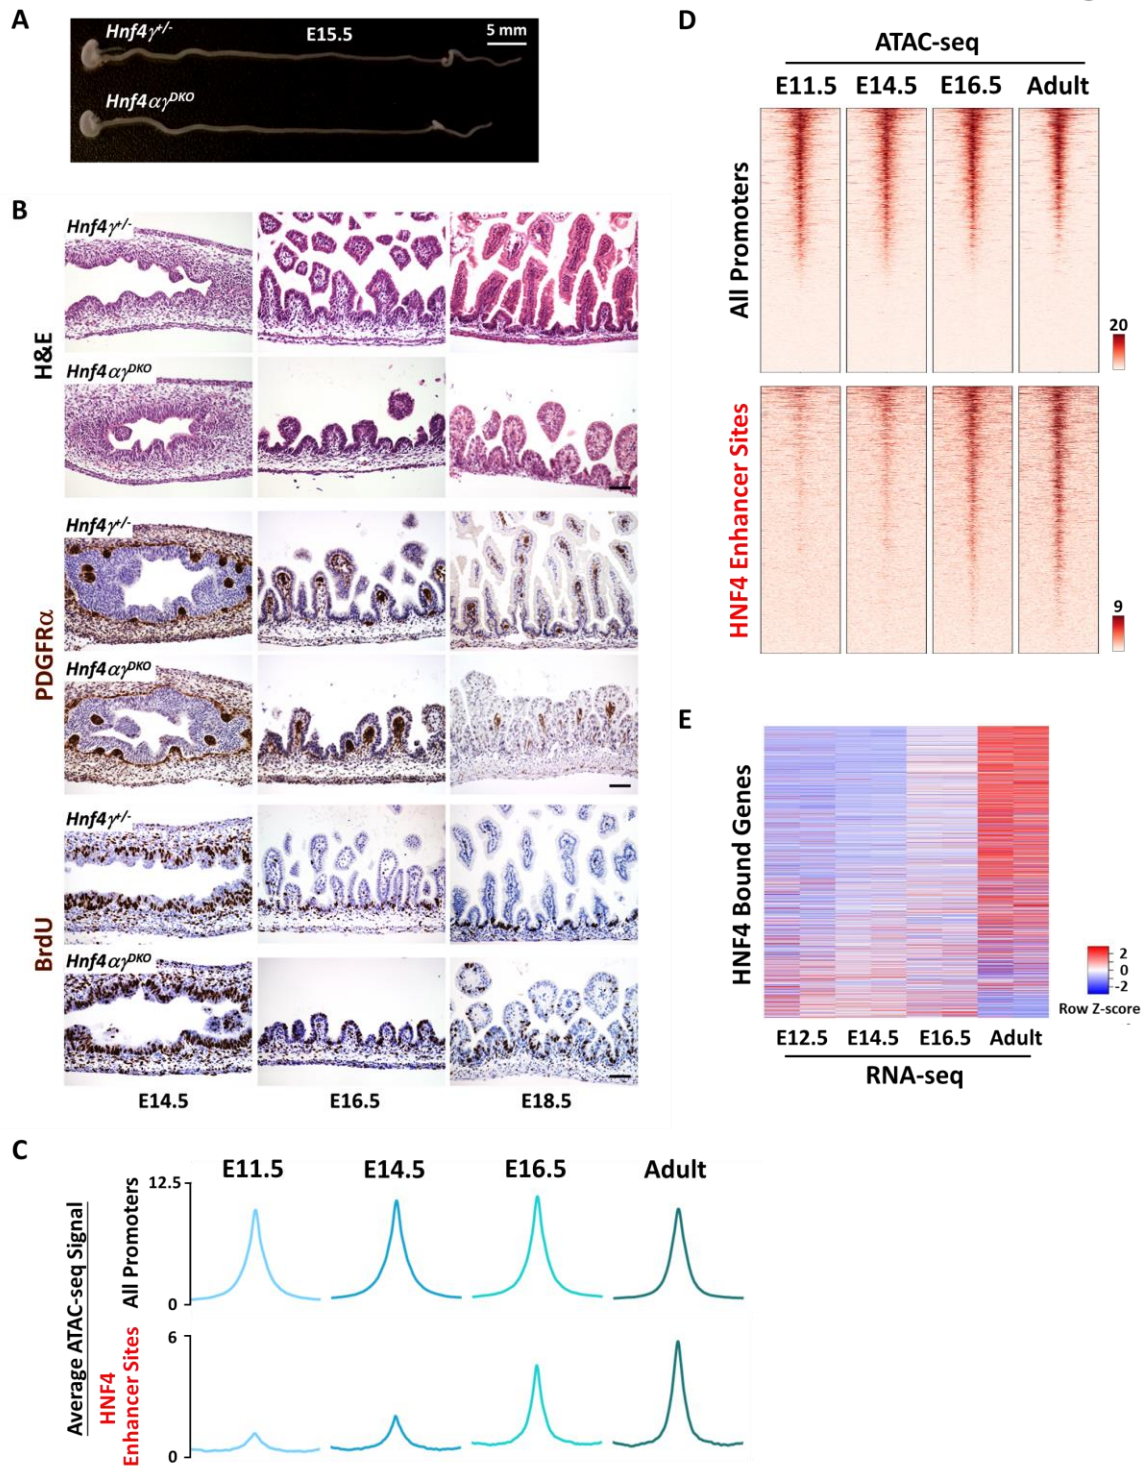

525

526

527 **Fig. 5. Villus morphogenesis initiates despite the loss of HNF4, and chromatin accessibility and**

528 **gene regulation at HNF4-binding sites suggest a role for HNF4 after villus morphogenesis. (A)**

529 *Hnf4* $\gamma^{-/-}$  control embryos at E15.5 (n = 4 biological replicates per genotype). (B) H&E staining and

530 immunostaining of PDGFR $\alpha$  and BrdU across developmental time show no striking differences,



531 indicating that HNF4 factors are dispensable for the onset of villus morphogenesis  
532 (representative of 4 biological replicates). The pregnant female mice were injected with 1 mg  
533 BrdU 1 h before euthanasia. Scale bars, 50  $\mu$ m. (C-D) Chromatin becomes accessible during fetal  
534 and adult stages at enhancer regions bound by HNF4 in the adult epithelium (MACS  $P$  value  $\leq 10^{-3}$ ,  
535 GSE112946,  $n = 2$  biological replicates per ChIP), indicating a potential role for HNF4 in  
536 activating genes nearby these regions during intestinal maturation. (E) Increased transcript  
537 levels of HNF4-bound genes in intestinal epithelial cells are observed across developmental time  
538 from E12.5 to adult villi. Genes with transcriptional start sites within 20 kb of HNF4 enhancer  
539 bound sites were used for plotting a heatmap showing the relative transcript expression levels  
540 over the indicated developmental stages (GSE115541,  $n = 2$  biological replicates per timepoint).

541  
542  
543  
544

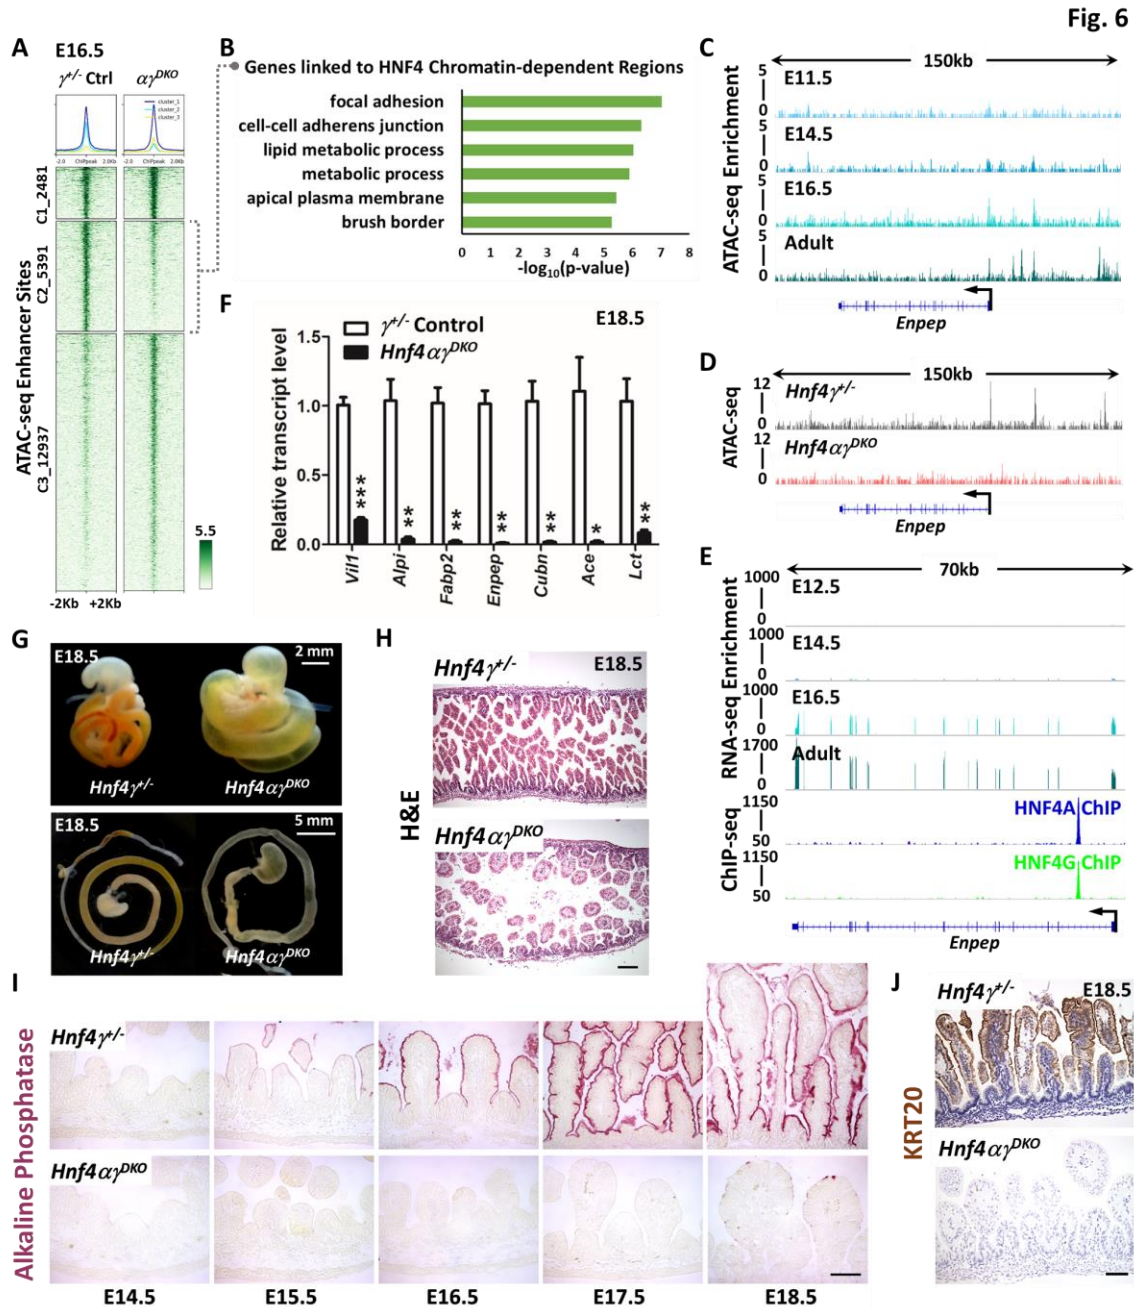

545

546 **Fig. 6. HNF4 paralogs are redundantly required for fetal maturation of the intestine.** (A) *K*-  
 547 means clustering of ATAC-seq data collected from E16.5 intestinal epithelial cells isolated from  
 548 *Hnf4*  $\alpha\gamma^{DKO}$  and control embryos identify 5,391 regions (cluster 2) that are dependent on HNF4  
 549 factors for chromatin accessibility ( $n = 2$  biological *Hnf4*  $\alpha\gamma^{DKO}$  replicates and 1 *Hnf4*  $\gamma^{-/-}$  control in  
 550 this study; MACS  $P$  value  $\leq 10^{-5}$ ). (B) Functional annotation of the genes linked to HNF4-  
 551 dependent accessible chromatin by DAVID. Genes with transcriptional start sites within 20 kb of  
 552 ATAC-seq sites of cluster 2 (loss of chromatin accessibility upon HNF4 loss) from panel 6A were  
 553 used for analysis. (C-E) Examples of chromatin accessibility at HNF4 dependent ATAC-seq sites  
 554 are visualized using IGV. (C) ATAC-seq (GSE115541) shows a time-dependent increase of

555 chromatin accessibility at locus of the brush border gene *Enpep* from E11.5 embryo to adult. (D)  
556 ATAC-seq shows compromised chromatin accessibility at the *Enpep* locus is observed in E16.5  
557 *Hnf4α<sup>DKO</sup>*. (E) RNA-seq (GSE115541) shows corresponding increase in transcript levels of *Enpep*  
558 over developmental time, and HNF4A and HNF4G directly bind to *Enpep* (GSE112946, ChIP-seq  
559 panel), suggesting a direct regulation. (F) qPCR shows that the transcript levels of genes known  
560 to be expressed in the mature intestine are dramatically reduced in *Hnf4α<sup>DKO</sup>* compared to that  
561 of the littermate *Hnf4γ<sup>+/-</sup>* controls in isolated E18.5 intestinal epithelial cells. Data are presented  
562 as mean ± SEM (n = 4 controls and 5 mutants, Student's t-test, two-sided at P < 0.001\*\*\*, P <  
563 0.01\*\* and P < 0.05\*). (G) Whole mount images of E18.5 intestine indicate that loss of HNF4  
564 paralogs leads to an underdeveloped intestine with distended and translucent lumen  
565 (representative of 6 biological replicates). (H) Strikingly stunted villi are observed in E18.5  
566 *Hnf4α<sup>DKO</sup>* embryos compared to littermate *Hnf4γ<sup>+/-</sup>* controls, as revealed by H&E staining  
567 (representative of 4 biological replicates, E18.5 duodenum; see expanded panel in [Fig.S3D](#)). (I)  
568 *Hnf4α<sup>DKO</sup>* exhibits diminished alkaline phosphatase staining (differentiation marker) across  
569 developmental time (representative of 4 biological replicates, E14.5-E18.5 duodenum). (J)  
570 Keratin 20 immunostaining also indicates compromised intestinal differentiation in *Hnf4α<sup>DKO</sup>*  
571 embryos (representative of 4 biological replicates, E18.5 duodenum). Scale bars, 50 μm. Also see  
572 [Fig.S2](#) and [Fig.S3](#) for additional metrics of intestinal maturation.

573

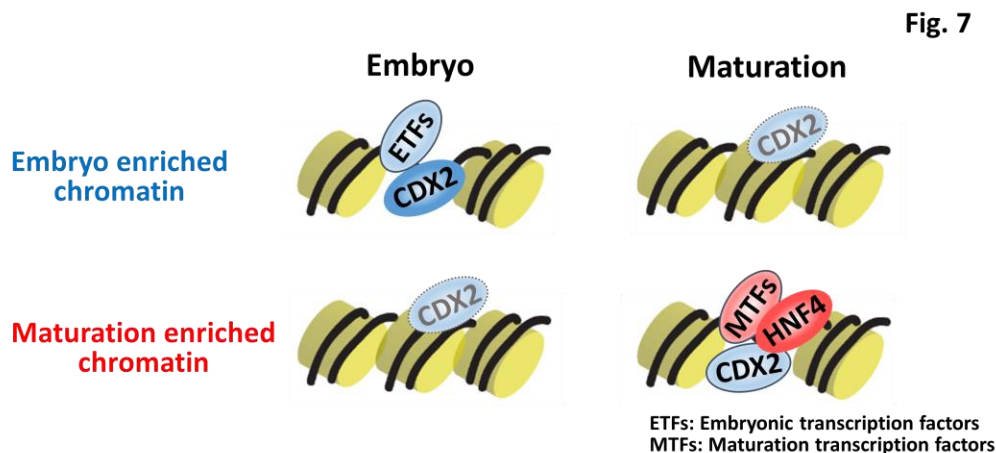

574

575 **Fig. 7. Potential model of how intestinal transcription factor networks shift as embryos**  
576  **mature to adults.** Left, CDX2 functions in gut specification, and robustly binds to embryo  
577 embryo enriched accessible chromatin regions with other embryonic transcription factors. In the  
578 embryo, lower-level CDX2 binding may also occur at regions that will become accessible in the  
579 fetus. Right, as intestine matures to fetal stages, maturation-enriched regions become more  
580 accessible. A new transcription factor network, highlighted by HNF4 works together to stabilize  
581 enhancer chromatin and drive intestinal maturation.  
582

Supplementary Fig. 1

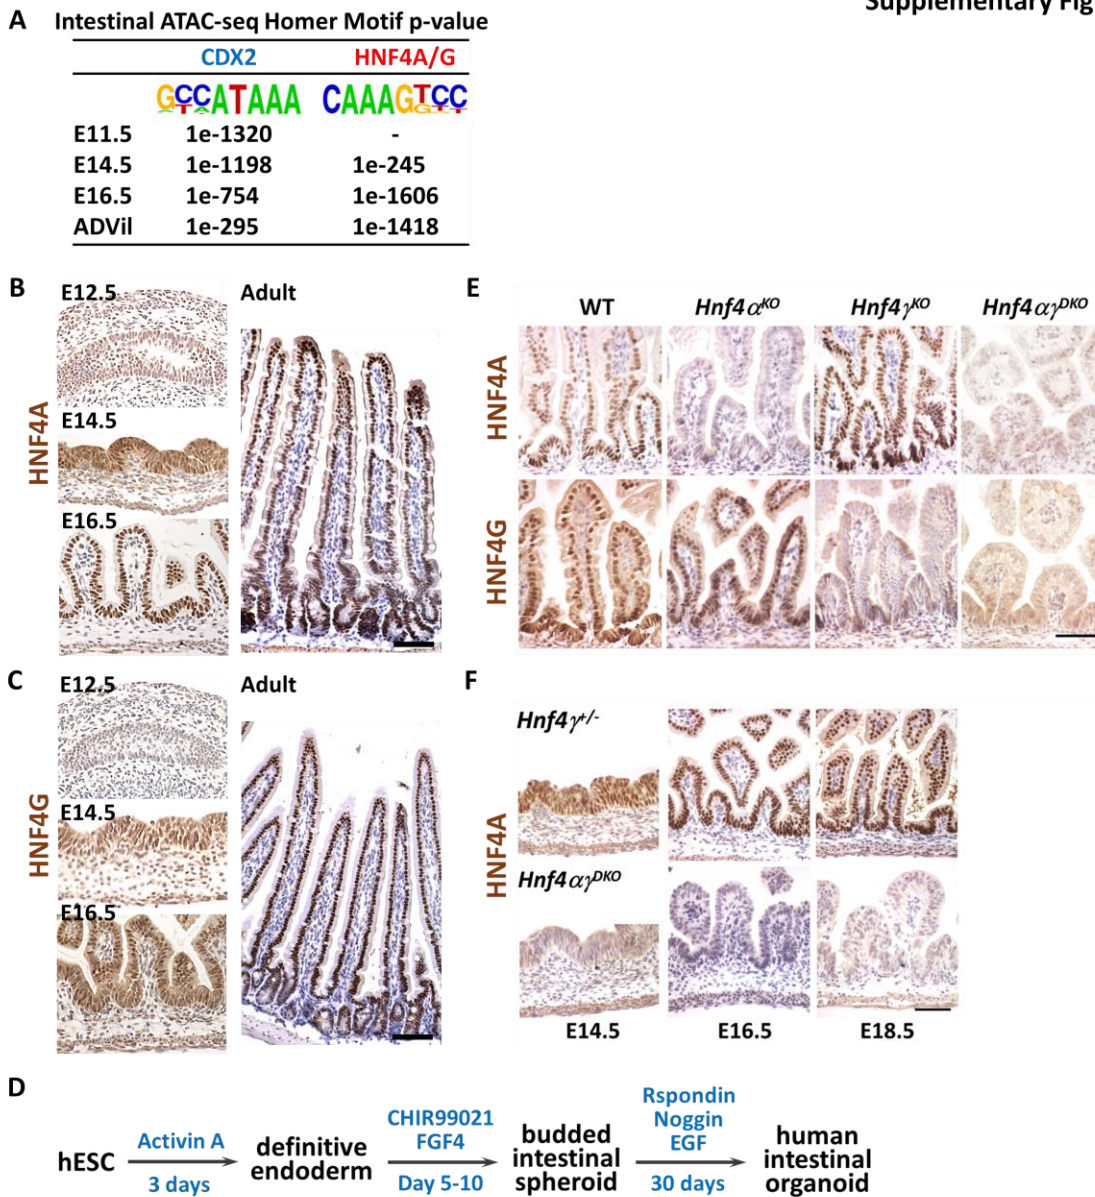

583

584 **Fig. S1. HNF4 expression in the intestinal epithelium across developmental time.** (A) HOMER  
 585 *de novo* analysis of ATAC-seq (GSE115541, n = 2 biological replicates per timepoint, MACS *P*  
 586 value  $\leq 10^{-5}$ ) of mouse intestinal epithelial cells at each developmental time shows that CDX2  
 587 binding motifs are present as early as E11.5, whereas HNF4 binding motifs are not present until  
 588 E14.5. HNF4 motifs are increasingly abundant at accessible regions as the intestine matures.  
 589 Immunostaining of (B) HNF4A and (C) HNF4G shows that relative protein levels of these factors  
 590 increase with developmental time in mouse (representative of 4 biological replicates,  
 591 duodenum). (D) Schematic of human intestinal organoids differentiated from hESCs (Tsai et al.,  
 592 2017). (E) HNF4A and HNF4G immunostaining shows loss of HNF4 in the E18.5 intestinal  
 593 epithelium of both single and double mutants (representative of 4 biological replicates, E18.5  
 594 duodenum). (F) Immunostaining of HNF4A shows loss of HNF4A in the intestinal epithelium of  
 595 E14.5 *Shh-Cre<sup>+</sup>* embryos (representative of 4 biological replicates, duodenum). Scale bars, 50  $\mu$ m.



Supplementary Fig.2

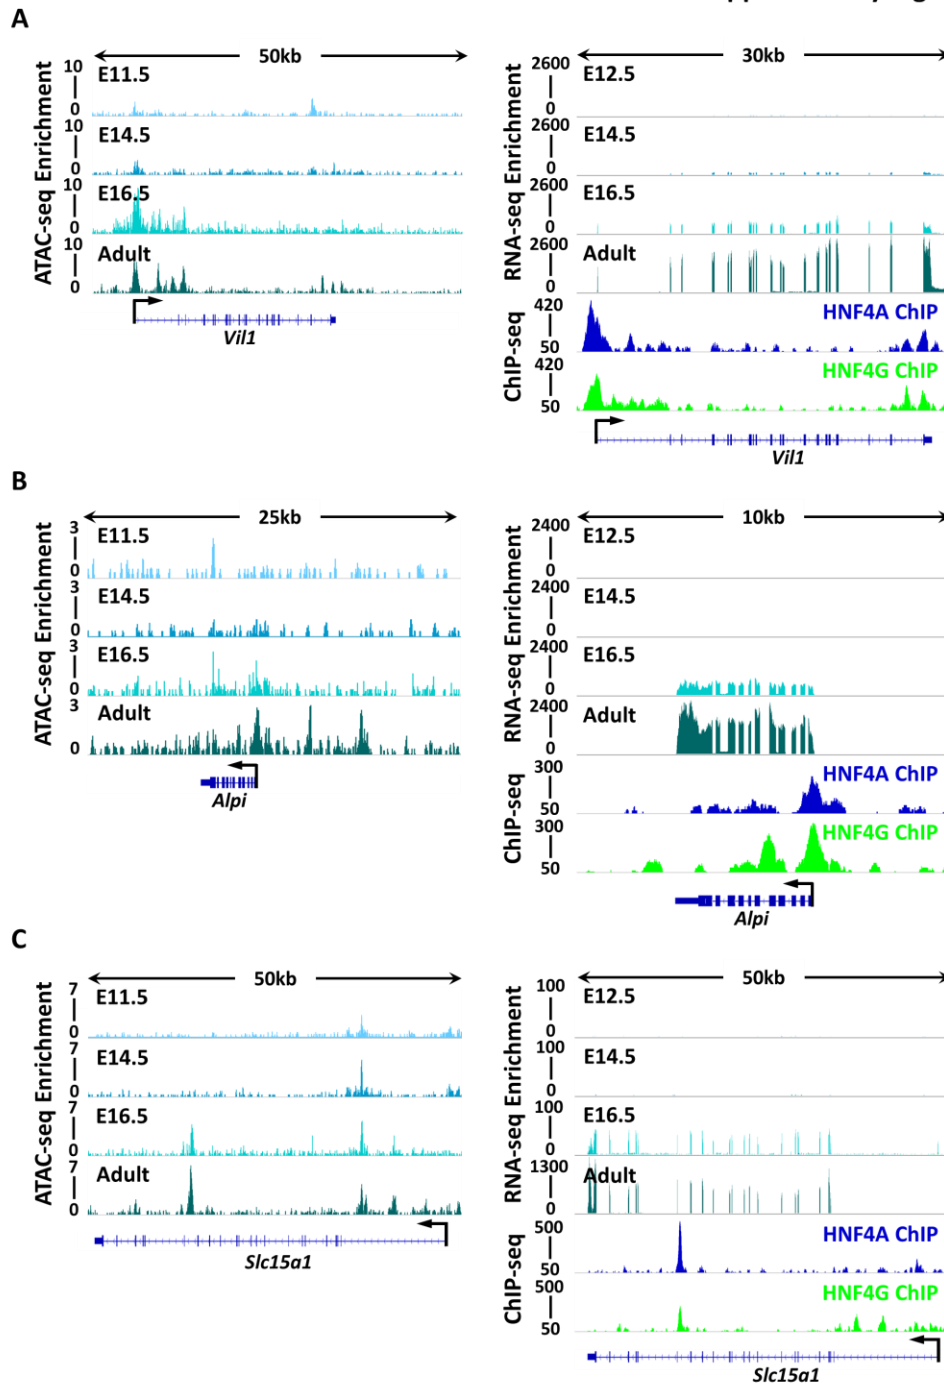

596

597 **Fig. S2. HNF4 paralogs bind to and activate maturation-specific genes.** Maturation-specific  
598 genes, such as (A) *Vil1*, (B) *Alpi* and (C) *Slc15a1*, show more accessible chromatin (ATAC-seq, left  
599 panels) and increased transcript levels (RNA-seq, right top panels) across developmental time,  
600 and HNF4 factors bind to the maturation-specific genes in the mature tissue of the adult (ChIP-  
601 seq, right bottom panels). n = 2 biological replicates per developmental timepoint for ATAC-seq  
602 (GSE115541), RNA-seq (GSE115541) and ChIP-seq (GSE112946).



Supplementary Fig. 3

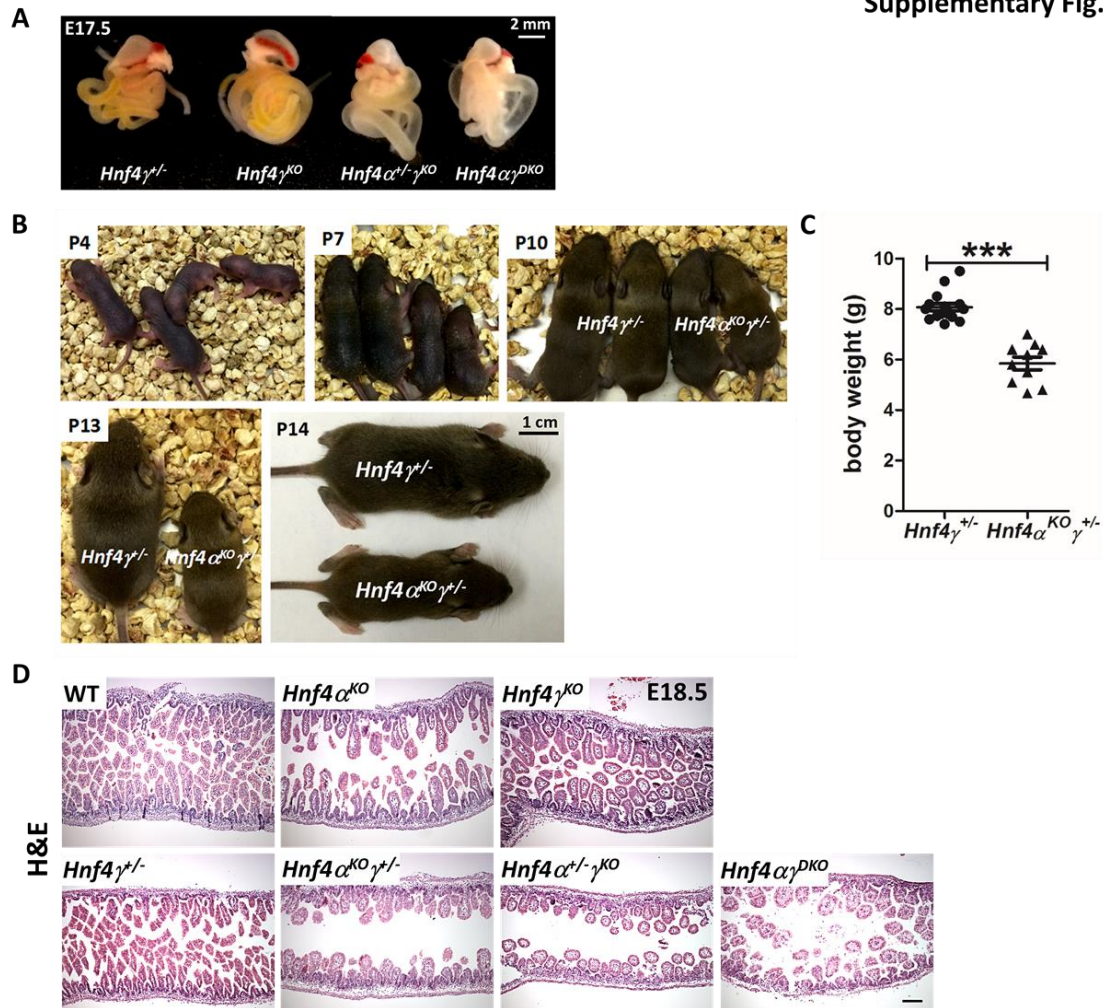

604

605 **Fig. S3. Loss of 3 *Hnf4* alleles in the developing gut leads to growth retardation after birth.** (A)  
 606 Loss of 3 or 4 *Hnf4* alleles in developing embryos leads to an underdeveloped intestine with  
 607 distended and translucent lumen (representative of 4 biological replicates). (B)  $Hnf4\alpha^{-/-}\gamma^{-/\Delta}$  pups  
 608 can survive after birth but show slower growth when compared to littermate controls. (C) Body  
 609 weight of P14 pups. Data are presented as mean  $\pm$  SEM ( $Hnf4\gamma^{-/-}$  controls: n = 16;  $Hnf4\alpha^{-/-}\gamma^{-/\Delta}$   
 610 mutants: n = 10; Student's t-test, two-sided at P < 0.001\*\*\*). (D) *Hnf4* single mutants have a  
 611 similar morphology to the controls, but loss of 3 or 4 *Hnf4* alleles in developing embryos leads to  
 612 strikingly stunted villi, as evidenced by H&E staining (representative of 4 biological replicates,  
 613 E18.5 duodenum; expanded panel  $\gamma$  from Fig.6H). Scale bars, 50 μm.

Supplementary Fig. 4

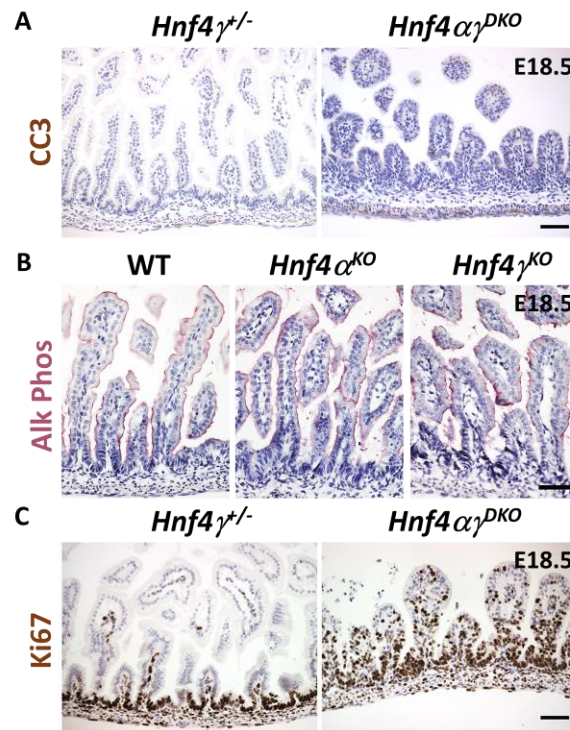

614

615 **Fig. S4. Additional histological and immunochemical features of HNF4 mutant intestines.** (A)  
616 *HNF4* mutants do not have significant cell death as shown in immunostaining of cleaved caspase  
617 3 (representative of 4 biological replicates, E18.5 duodenum). (B) *Hnf4* $\alpha^{KO}$  and *Hnf4* $\gamma^{KO}$  embryos  
618 do not have compromised intestinal maturation, as evidenced by alkaline phosphatase staining,  
619 indicating redundant roles for HNF4 factors in intestinal development (representative of 4  
620 biological replicates, E18.5 duodenum). (C) Proliferative cells (Ki67<sup>+</sup>) are observed in the villi of  
621 *Hnf4* $\alpha\gamma^{DKO}$ , which may be due to compromised tissue maturation (representative of 4 biological  
622 replicates, E18.5 duodenum). Scale bars, 50  $\mu$ m.

623

## 624 **References**

- 625 **Adachi, K., Nikaido, I., Ohta, H., Ohtsuka, S., Ura, H., Kadota, M., Wakayama, T., Ueda, H. R.**  
626 **and Niwa, H.** (2013). Context-dependent wiring of Sox2 regulatory networks for self-  
627 renewal of embryonic and trophoblast stem cells. *Molecular cell* **52**, 380-392.
- 628 **Babeu, J. P., Darsigny, M., Lussier, C. R. and Boudreau, F.** (2009). Hepatocyte nuclear factor  
629 4alpha contributes to an intestinal epithelial phenotype in vitro and plays a partial role  
630 in mouse intestinal epithelium differentiation. *American journal of physiology.*  
631 *Gastrointestinal and liver physiology* **297**, G124-134.
- 632 **Babicki, S., Arndt, D., Marcu, A., Liang, Y., Grant, J. R., Maciejewski, A. and Wishart, D. S.**  
633 (2016). Heatmapper: web-enabled heat mapping for all. *Nucleic acids research* **44**,  
634 W147-153.
- 635 **Banerjee, K. K., Saxena, M., Kumar, N., Chen, L., Cavazza, A., Toke, N. H., O'Neill, N. K., Madha,**  
636 **S., Jadhav, U., Verzi, M. P., et al.** (2018). Enhancer, transcriptional, and cell fate  
637 plasticity precedes intestinal determination during endoderm development. *Genes &*  
638 *development* **32**, 1430-1442.
- 639 **Boyd, M., Bressendorff, S., Moller, J., Olsen, J. and Troelsen, J. T.** (2009). Mapping of  
640 HNF4alpha target genes in intestinal epithelial cells. *BMC gastroenterology* **9**, 68.
- 641 **Bray, N. L., Pimentel, H., Melsted, P. and Pachter, L.** (2016). Near-optimal probabilistic RNA-seq  
642 quantification. *Nature biotechnology* **34**, 525-527.
- 643 **Buenrostro, J. D., Giresi, P. G., Zaba, L. C., Chang, H. Y. and Greenleaf, W. J.** (2013).  
644 Transposition of native chromatin for fast and sensitive epigenomic profiling of open  
645 chromatin, DNA-binding proteins and nucleosome position. *Nature methods* **10**, 1213-  
646 1218.
- 647 **Buenrostro, J. D., Wu, B., Chang, H. Y. and Greenleaf, W. J.** (2015). ATAC-seq: A Method for  
648 Assaying Chromatin Accessibility Genome-Wide. *Current protocols in molecular biology*  
649 **109**, 21 29 21-29.
- 650 **Cao, J., Spielmann, M., Qiu, X., Huang, X., Ibrahim, D. M., Hill, A. J., Zhang, F., Mundlos, S.,**  
651 **Christiansen, L., Steemers, F. J., et al.** (2019). The single-cell transcriptional landscape of  
652 mammalian organogenesis. *Nature* **566**, 496-502.
- 653 **Cattin, A. L., Le Beyec, J., Barreau, F., Saint-Just, S., Houllier, A., Gonzalez, F. J., Robine, S.,**  
654 **Pincon-Raymond, M., Cardot, P., Lacasa, M., et al.** (2009). Hepatocyte nuclear factor  
655 4alpha, a key factor for homeostasis, cell architecture, and barrier function of the adult  
656 intestinal epithelium. *Molecular and cellular biology* **29**, 6294-6308.
- 657 **Chahar, S., Gandhi, V., Yu, S., Desai, K., Cowper-Sal-lari, R., Kim, Y., Perekatt, A. O., Kumar, N.,**  
658 **Thackray, J. K., Musolf, A., et al.** (2014). Chromatin profiling reveals regulatory network  
659 shifts and a protective role for hepatocyte nuclear factor 4alpha during colitis. *Molecular*  
660 *and cellular biology* **34**, 3291-3304.
- 661 **Chen, L., Toke, N. H., Luo, S., Vasoya, R. P., Fullem, R. L., Parthasarathy, A., Perekatt, A. O. and**  
662 **Verzi, M. P.** (2019). A reinforcing HNF4-SMAD4 feed-forward module stabilizes  
663 enterocyte identity. *Nature genetics*, 10.1038/s41588-41019-40384-41580.
- 664 **Chen, W. S., Manova, K., Weinstein, D. C., Duncan, S. A., Plump, A. S., Prezioso, V. R.,**  
665 **Bachvarova, R. F. and Darnell, J. E., Jr.** (1994). Disruption of the HNF-4 gene, expressed  
666 in visceral endoderm, leads to cell death in embryonic ectoderm and impaired  
667 gastrulation of mouse embryos. *Genes & development* **8**, 2466-2477.
- 668 **Chin, A. M., Hill, D. R., Aurora, M. and Spence, J. R.** (2017). Morphogenesis and maturation of  
669 the embryonic and postnatal intestine. *Seminars in cell & developmental biology* **66**, 81-  
670 93.

- 671 **Consortium, E. P.** (2012). An integrated encyclopedia of DNA elements in the human genome.  
672 *Nature* **489**, 57-74.
- 673 **Davison, J. M., Lickwar, C. R., Song, L., Breton, G., Crawford, G. E. and Rawls, J. F.** (2017).  
674 Microbiota regulate intestinal epithelial gene expression by suppressing the  
675 transcription factor Hepatocyte nuclear factor 4 alpha. *Genome research* **27**, 1195-1206.
- 676 **Donaghey, J., Thakurela, S., Charlton, J., Chen, J. S., Smith, Z. D., Gu, H., Pop, R., Clement, K.,**  
677 **Stamenova, E. K., Karnik, R., et al.** (2018). Genetic determinants and epigenetic effects  
678 of pioneer-factor occupancy. *Nature genetics* **50**, 250-258.
- 679 **Duncan, S. A., Nagy, A. and Chan, W.** (1997). Murine gastrulation requires HNF-4 regulated  
680 gene expression in the visceral endoderm: tetraploid rescue of Hnf-4(-/-) embryos.  
681 *Development* **124**, 279-287.
- 682 **Gao, N., White, P. and Kaestner, K. H.** (2009). Establishment of intestinal identity and epithelial-  
683 mesenchymal signaling by Cdx2. *Developmental cell* **16**, 588-599.
- 684 **Garrison, W. D., Battle, M. A., Yang, C., Kaestner, K. H., Sladek, F. M. and Duncan, S. A.** (2006).  
685 Hepatocyte nuclear factor 4alpha is essential for embryonic development of the mouse  
686 colon. *Gastroenterology* **130**, 1207-1220.
- 687 **Grainger, S., Savory, J. G. and Lohnes, D.** (2010). Cdx2 regulates patterning of the intestinal  
688 epithelium. *Developmental biology* **339**, 155-165.
- 689 **Harfe, B. D., Scherz, P. J., Nissim, S., Tian, H., McMahon, A. P. and Tabin, C. J.** (2004). Evidence  
690 for an expansion-based temporal Shh gradient in specifying vertebrate digit identities.  
691 *Cell* **118**, 517-528.
- 692 **Harper, J., Mould, A., Andrews, R. M., Bikoff, E. K. and Robertson, E. J.** (2011). The  
693 transcriptional repressor Blimp1/Prdm1 regulates postnatal reprogramming of intestinal  
694 enterocytes. *Proceedings of the National Academy of Sciences of the United States of*  
695 *America* **108**, 10585-10590.
- 696 **Hayhurst, G. P., Lee, Y. H., Lambert, G., Ward, J. M. and Gonzalez, F. J.** (2001). Hepatocyte  
697 nuclear factor 4alpha (nuclear receptor 2A1) is essential for maintenance of hepatic  
698 gene expression and lipid homeostasis. *Molecular and cellular biology* **21**, 1393-1403.
- 699 **Heinz, S., Benner, C., Spann, N., Bertolino, E., Lin, Y. C., Laslo, P., Cheng, J. X., Murre, C., Singh,**  
700 **H. and Glass, C. K.** (2010). Simple combinations of lineage-determining transcription  
701 factors prime cis-regulatory elements required for macrophage and B cell identities.  
702 *Molecular cell* **38**, 576-589.
- 703 **Huang da, W., Sherman, B. T. and Lempicki, R. A.** (2009). Systematic and integrative analysis of  
704 large gene lists using DAVID bioinformatics resources. *Nature protocols* **4**, 44-57.
- 705 **Kazakevych, J., Sayols, S., Messner, B., Krienke, C. and Soshnikova, N.** (2017). Dynamic changes  
706 in chromatin states during specification and differentiation of adult intestinal stem cells.  
707 *Nucleic acids research* **45**, 5770-5784.
- 708 **Kim, D., Pertea, G., Trapnell, C., Pimentel, H., Kelley, R. and Salzberg, S. L.** (2013). TopHat2:  
709 accurate alignment of transcriptomes in the presence of insertions, deletions and gene  
710 fusions. *Genome biology* **14**, R36.
- 711 **Kumar, N., Tsai, Y. H., Chen, L., Zhou, A., Banerjee, K. K., Saxena, M., Huang, S., Toke, N. H.,**  
712 **Xing, J., Shivdasani, R. A., et al.** (2019). The lineage-specific transcription factor CDX2  
713 navigates dynamic chromatin to control distinct stages of intestine development.  
714 *Development* **146**.
- 715 **Langmead, B. and Salzberg, S. L.** (2012). Fast gapped-read alignment with Bowtie 2. *Nature*  
716 *methods* **9**, 357-359.
- 717 **Li, J., Ning, G. and Duncan, S. A.** (2000). Mammalian hepatocyte differentiation requires the  
718 transcription factor HNF-4alpha. *Genes & development* **14**, 464-474.



- 719 **Lindeboom, R. G., van Voorthuijsen, L., Oost, K. C., Rodriguez-Colman, M. J., Luna-Velez, M. V.,**  
720 **Furlan, C., Baraille, F., Jansen, P. W., Ribeiro, A., Burgering, B. M., et al. (2018).**  
721 Integrative multi-omics analysis of intestinal organoid differentiation. *Molecular systems*  
722 *biology* **14**, e8227.
- 723 **Liu, T., Ortiz, J. A., Taing, L., Meyer, C. A., Lee, B., Zhang, Y., Shin, H., Wong, S. S., Ma, J., Lei, Y.,**  
724 **et al. (2011).** Cistrome: an integrative platform for transcriptional regulation studies.  
725 *Genome biology* **12**, R83.
- 726 **Love, M. I., Huber, W. and Anders, S. (2014).** Moderated estimation of fold change and  
727 dispersion for RNA-seq data with DESeq2. *Genome biology* **15**, 550.
- 728 **Madison, B. B., Dunbar, L., Qiao, X. T., Braunstein, K., Braunstein, E. and Gumucio, D. L. (2002).**  
729 Cis elements of the villin gene control expression in restricted domains of the vertical  
730 (crypt) and horizontal (duodenum, cecum) axes of the intestine. *The Journal of biological*  
731 *chemistry* **277**, 33275-33283.
- 732 **McLean, C. Y., Bristor, D., Hiller, M., Clarke, S. L., Schaar, B. T., Lowe, C. B., Wenger, A. M. and**  
733 **Bejerano, G. (2010).** GREAT improves functional interpretation of cis-regulatory regions.  
734 *Nature biotechnology* **28**, 495-501.
- 735 **Mould, A. W., Morgan, M. A., Nelson, A. C., Bikoff, E. K. and Robertson, E. J. (2015).**  
736 Blimp1/Prdm1 Functions in Opposition to Irf1 to Maintain Neonatal Tolerance during  
737 Postnatal Intestinal Maturation. *PLoS genetics* **11**, e1005375.
- 738 **Nerurkar, N. L., Mahadevan, L. and Tabin, C. J. (2017).** BMP signaling controls buckling forces to  
739 modulate looping morphogenesis of the gut. *Proceedings of the National Academy of*  
740 *Sciences of the United States of America* **114**, 2277-2282.
- 741 **Niwa, H. (2018).** The principles that govern transcription factor network functions in stem cells.  
742 *Development* **145**.
- 743 **Nord, A. S., Blow, M. J., Attanasio, C., Akiyama, J. A., Holt, A., Hosseini, R., Phouanavong, S.,**  
744 **Plajzer-Frick, I., Shoukry, M., Afzal, V., et al. (2013).** Rapid and pervasive changes in  
745 genome-wide enhancer usage during mammalian development. *Cell* **155**, 1521-1531.
- 746 **Parviz, F., Matullo, C., Garrison, W. D., Savatski, L., Adamson, J. W., Ning, G., Kaestner, K. H.,**  
747 **Rossi, J. M., Zaret, K. S. and Duncan, S. A. (2003).** Hepatocyte nuclear factor 4alpha  
748 controls the development of a hepatic epithelium and liver morphogenesis. *Nature*  
749 *genetics* **34**, 292-296.
- 750 **Pinello, L., Farouni, R. and Yuan, G. C. (2018).** Haystack: systematic analysis of the variation of  
751 epigenetic states and cell-type specific regulatory elements. *Bioinformatics* **34**, 1930-  
752 1933.
- 753 **Quinlan, A. R. (2014).** BEDTools: The Swiss-Army Tool for Genome Feature Analysis. *Current*  
754 *protocols in bioinformatics* **47**, 11.12.11-34.
- 755 **Ramirez, F., Ryan, D. P., Gruning, B., Bhardwaj, V., Kilpert, F., Richter, A. S., Heyne, S., Dunder,**  
756 **F. and Manke, T. (2016).** deepTools2: a next generation web server for deep-sequencing  
757 data analysis. *Nucleic acids research* **44**, W160-165.
- 758 **Robinson, J. T., Thorvaldsdottir, H., Winckler, W., Guttman, M., Lander, E. S., Getz, G. and**  
759 **Mesirov, J. P. (2011).** Integrative genomics viewer. *Nature biotechnology* **29**, 24-26.
- 760 **Sekiya, T., Muthurajan, U. M., Luger, K., Tulin, A. V. and Zaret, K. S. (2009).** Nucleosome-  
761 binding affinity as a primary determinant of the nuclear mobility of the pioneer  
762 transcription factor FoxA. *Genes & development* **23**, 804-809.
- 763 **Shen, Y., Yue, F., McCleary, D. F., Ye, Z., Edsall, L., Kuan, S., Wagner, U., Dixon, J., Lee, L.,**  
764 **Lobanenkov, V. V., et al. (2012).** A map of the cis-regulatory sequences in the mouse  
765 genome. *Nature* **488**, 116-120.



- 766 **Shin, H., Liu, T., Manrai, A. K. and Liu, X. S.** (2009). CEAS: cis-regulatory element annotation  
767 system. *Bioinformatics* **25**, 2605-2606.
- 768 **Soneson, C., Love, M. I. and Robinson, M. D.** (2015). Differential analyses for RNA-seq:  
769 transcript-level estimates improve gene-level inferences. *F1000Research* **4**, 1521.
- 770 **Tsai, Y. H., Nattiv, R., Dedhia, P. H., Nagy, M. S., Chin, A. M., Thomson, M., Klein, O. D. and**  
771 **Spence, J. R.** (2017). In vitro patterning of pluripotent stem cell-derived intestine  
772 recapitulates in vivo human development. *Development* **144**, 1045-1055.
- 773 **Verzi, M. P., Shin, H., He, H. H., Sulahian, R., Meyer, C. A., Montgomery, R. K., Fleet, J. C.,**  
774 **Brown, M., Liu, X. S. and Shivdasani, R. A.** (2010). Differentiation-specific histone  
775 modifications reveal dynamic chromatin interactions and partners for the intestinal  
776 transcription factor CDX2. *Developmental cell* **19**, 713-726.
- 777 **Verzi, M. P., Shin, H., Ho, L. L., Liu, X. S. and Shivdasani, R. A.** (2011). Essential and redundant  
778 functions of caudal family proteins in activating adult intestinal genes. *Molecular and*  
779 *cellular biology* **31**, 2026-2039.
- 780 **Verzi, M. P., Shin, H., San Roman, A. K., Liu, X. S. and Shivdasani, R. A.** (2013). Intestinal master  
781 transcription factor CDX2 controls chromatin access for partner transcription factor  
782 binding. *Molecular and cellular biology* **33**, 281-292.
- 783 **Visel, A., Blow, M. J., Li, Z., Zhang, T., Akiyama, J. A., Holt, A., Plajzer-Frick, I., Shoukry, M.,**  
784 **Wright, C., Chen, F., et al.** (2009). ChIP-seq accurately predicts tissue-specific activity of  
785 enhancers. *Nature* **457**, 854-858.
- 786 **Walton, K. D., Freddo, A. M., Wang, S. and Gumucio, D. L.** (2016a). Generation of intestinal  
787 surface: an absorbing tale. *Development* **143**, 2261-2272.
- 788 **Walton, K. D., Kolterud, A., Czerwinski, M. J., Bell, M. J., Prakash, A., Kushwaha, J., Grosse, A.**  
789 **S., Schnell, S. and Gumucio, D. L.** (2012). Hedgehog-responsive mesenchymal clusters  
790 direct patterning and emergence of intestinal villi. *Proceedings of the National Academy*  
791 *of Sciences of the United States of America* **109**, 15817-15822.
- 792 **Walton, K. D., Whidden, M., Kolterud, A., Shoffner, S. K., Czerwinski, M. J., Kushwaha, J.,**  
793 **Parmar, N., Chandrasekhar, D., Freddo, A. M., Schnell, S., et al.** (2016b). Villification in  
794 the mouse: Bmp signals control intestinal villus patterning. *Development* **143**, 427-436.
- 795 **Wells, J. M. and Spence, J. R.** (2014). How to make an intestine. *Development* **141**, 752-760.
- 796 **Wilkinson, A. C., Nakauchi, H. and Gottgens, B.** (2017). Mammalian Transcription Factor  
797 Networks: Recent Advances in Interrogating Biological Complexity. *Cell systems* **5**, 319-  
798 331.
- 799 **Zhang, Y., Liu, T., Meyer, C. A., Eickhout, J., Johnson, D. S., Bernstein, B. E., Nusbaum, C.,**  
800 **Myers, R. M., Brown, M., Li, W., et al.** (2008). Model-based analysis of ChIP-Seq  
801 (MACS). *Genome biology* **9**, R137.

802
